# Supplementary material for: HPAI 9G DNAChip: discrimination of highly pathogenic influenza virus genes
Source: Royal Society of Chemistry journal article supplement (doi:10.1039/c2cc30709j), 2012-01-01
Supplement: c2cc30709j.pdf [file c2cc30709j.pdf]

# HPAI 9G DNAChip: Discrimination of Highly Pathogenic Influenza Virus Genes

Van-Thuan Nguyen<sup>a</sup>, Satish Balasaheb Nimse<sup>a</sup>, Keum-Soo Song<sup>b</sup>, Junghoon Kim<sup>b</sup>, Van-Thao Ta<sup>a</sup>, Haan Woo Sung<sup>c</sup>, Taisun Kim<sup>a\*</sup>

<sup>a</sup>Institute for Applied Chemistry and Department of Chemistry, Hallym University, Chuncheon, 200-702, Korea, Fax: +82-33-256-3421, E-mail: tskim@hallym.ac.kr

<sup>b</sup>Biometrix Technology, Inc. 202 BioVenture Plaza, Chuncheon, 200-161, Korea

<sup>c</sup>College of Veterinary Medicine, Kangwon National University, Chuncheon, 200-701, Korea

## Supporting Information

|                                                                                                                                                       |                |
|-------------------------------------------------------------------------------------------------------------------------------------------------------|----------------|
| <b>1. Materials and methods</b>                                                                                                                       | <b>S2</b>      |
| <b>2. Composition of different solutions used</b>                                                                                                     | <b>S2</b>      |
| <b>3. Probes and target oligonucleotides</b>                                                                                                          | <b>S3-S6</b>   |
| <b>4. Generalized probe selection method</b>                                                                                                          | <b>S7</b>      |
| <b>5. Methods and experimental procedures</b>                                                                                                         | <b>S7-S9</b>   |
| <b>6. Results for hybridization of the probes (without mutations)</b>                                                                                 | <b>S10-S16</b> |
| <b>7. Results for hybridization of the probes (with one artificial mutations)</b>                                                                     | <b>S17-S23</b> |
| <b>8. Comparison of the results after hybridization of the original probes<br/>(Without mutation) and final probes (with one artificial mutation)</b> | <b>S24-S26</b> |
| <b>9. Comparison of the probes with and without artificial mutations</b>                                                                              | <b>S27</b>     |
| <b>10. Sensitivity of the HPAI 9G DNAChip</b>                                                                                                         | <b>S28</b>     |
| <b>11. Detection limit of HPAI 9G DNAChip</b>                                                                                                         | <b>S29</b>     |
| <b>12. References</b>                                                                                                                                 | <b>S29</b>     |

## 1. Materials and methods

All chemicals were purchased from Sigma-Aldrich Chemicals, Korea. All the oligonucleotides were purchased from Bioneer, Korea. The RT-PCR pre-mix and RNA extractions kits were obtained from the Introgen, Korea. Glass slides (2.5x7.5 cm) were purchased from Paul Marienfeld GmbH & Co. KG, Germany. All washing solvents for the substrates are of HPLC grade from SK Chemicals, Korea. Ultrapure water (18 M  $\Omega$ /cm) was obtained from a Milli-Q purification system (Millipore). The DNA chips with modified with the under mentioned probes (**Table 1**) were obtained from Biometrix technology Inc., Korea. Oligonucleotides were spotted using Qarray2 microarrayer (Genetix Technologies, Inc.) to produce DNA Chips used for the experiments. The HPAI genomic DNA's used in this study for PCR amplification were obtained from Department of Veterinary Medicine, Kangwon National University (Korea). However, the HPAI genomic DNA's used in this study for PCR amplification were obtained by RT-PCR of the clinical samples and standardized by the sequencing analysis (Table S2). Virus strains used: feces/Korea/CSM2/02 (H5N3); A/duck/Hokkaido/Vac-3/2007(H5N1); A/chicken/Korea/IS2/2006(H5N1); A/duck/Hokkaido/HY57/2005(H9N4); A/duck/Shantou/163/2004 (H9N2); Influenza A virus (A/duck/Hong Kong/147/1977(H9N6). Influenza RNA was extracted as described previously<sup>1</sup> and stored at -70°C. All DNA chips used in this study were obtained by following the previously reported method.<sup>2</sup>

## 2. Composition of different solutions used for hybridization and washing on 9G DNAChips

1. Immobilization solution (pH = 7.4): 15% glycerol, 50mM butyl amine, 600mM NH<sub>4</sub>Cl
2. Blocking buffer solution (pH = 7.4): 0.5% milk casein in 4xSSC
3. Hybridization buffer (pH = 7.4): 25% Formamide, 0.1% Triton X-100, 6xSSC
4. Washing buffer solution A (pH = 7.4): 0.1% SDS in 4xSSC
5. Washing buffer solution B (pH = 7.4): 4xSSC

### 3. Probes and Target oligonucleotides:

**Table 1.** Sequences and the nomenclature of probe and target oligonucleotides

| Probes                                          | Probe Description | Probe starting position | HPAI subtype | Sequence                                           |
|-------------------------------------------------|-------------------|-------------------------|--------------|----------------------------------------------------|
| <b>Original HPAI Probes (without mutations)</b> |                   |                         |              |                                                    |
| Probe1                                          | H5N3              | -3                      | H5N3         | 5'-GGGGGGGGG CTTTATCTT GAG GAC TAT TCG GGG CC-3'   |
| Probe2                                          | H5N1              | -3                      | H5N1         | 5'-GGGGGGGGG CTTTATCTT GAG GAC TAT TTG GGG CC-3'   |
| Probe3                                          | H5N1(K)           | -3                      | H5N1 (K)     | 5'-GGGGGGGGG CTTTATCTT GAG GAC TAT TTG GAG CT-3'   |
| Probe4                                          | H7N1              | -3                      | H7N1         | 5'-GGGGGGGGG CTTTATCTT GAG GCC TAT TTG GTG CC-3'   |
| Probe5                                          | H7N3              | -3                      | H7N3         | 5'-GGGGGGGGG CTTTATCTT GAG GAC TCT TCG GGG CA-3'   |
| Probe6                                          | H7N7              | -4                      | H7N7         | 5'-GGGGGGGGG CTTTATCTT AGG CTT ATT TGG TGC CA-3'   |
| Probe7                                          | H9N4              | -3                      | H9N4         | 5'-GGGGGGGGG CTTTATCTT GAG GGT TGT TTG GTG CT-3'   |
| Probe8                                          | H9N2              | -3                      | H9N2         | 5'-GGGGGGGGG CTTTATCTT GAG GGC TCT TCG GTG CC-3'   |
| Probe9                                          | H9N6              | -3                      | H9N6         | 5'-GGGGGGGGG CTTTATCTT GAG GGC TAT TTG GTG CC-3'   |
| <b>HPAI Probes with one artificial mutation</b> |                   |                         |              |                                                    |
| Probes                                          | Probe Description | Mutation position       | HPAI subtype | Sequence                                           |
| Probe10                                         | H5N3              | 13T                     | H5N3         | 5'-GGGGGGGGG CTTTATCTT GAG GTC TAT TCG GGG CC-3'   |
| Probe11                                         | H5N1              | 10T                     | H5N1         | 5'-GGGGGGGGG CTTTATCTT GAG GAC TTT TTG GGG CC-3'   |
| Probe12                                         | H5N1(K)           | 10T                     | H5N1 (K)     | 5'-GGGGGGGGG CTTTATCTT GAG GAC TTT TTG GAG CT-3'   |
| Probe13                                         | H7N1              | 5T                      | H7N1         | 5'-GGGGGGGGG CTTTATCTT GAG GCC TAT TTG TTG CC-3'   |
| Probe14                                         | H7N3              | 5T                      | H7N3         | 5'-GGGGGGGGG CTTTATCTT GAG GAC TCT TCG TGG CA-3'   |
| Probe15                                         | H7N7              | 4T                      | H7N7         | 5'-GGGGGGGGG CTTTATCTT GAG GAC TCT TCG TTG CA-3'   |
| Probe16                                         | H9N4              | 5T                      | H9N4         | 5'-GGGGGGGGG CTTTATCTT GAG GGT TGT TTG TTG CT-3'   |
| Probe17                                         | H9N2              | 5T                      | H9N2         | 5'-GGGGGGGGG CTTTATCTT GAG GGC TCT TCG TTG CC-3'   |
| Probe18                                         | H9N6              | 5T                      | H9N6         | 5'-GGGGGGGGG CTTTATCTT GAG GGC TAT TTG TTG CC-3'   |
|                                                 | HC                |                         | HC           | 5'-GGGGGGGGG TTTTATCCT AG TGG CTC TAT GGT AAC-3'   |
|                                                 | NC                |                         | NC           | 5'-GGGGGGGGG AAA GCT GCT GCT CGT CGT CGT CGT       |
|                                                 | Target1           |                         | HC-Cy5-T1    | 3'- GGA TCA CCG AGA TAC CAT TG GAG ACT GCG -Cy5-5' |
|                                                 | H5(FP)            | Primer                  | H5-918F      | 5'- CCA RTR GGK GCK ATA AAY TC -3'                 |
|                                                 | H7(FP)            | Primer                  | MMU31 C      | 5'-GGGGCYTTYATAGCTCCWGAYCGKGC-3'                   |
|                                                 | H9(FP)            | Primer                  | H9-943F      | 5'- CAC AAT GTM AGY AAR TAT GC -3'                 |
|                                                 | URP               | Primer                  | RP-Cy5       | 5'-Cy5-C WAT GAA DCC HGC TAT RGC- 3'               |

HC – probe for the Hybridization control, HC-Cy5-T1 – Target oligonucleotide for HC probe, GGGGGGGGG – 9G for immobilization of the probes on the AMCA slides, CTT TAT – vertical spacer group, FP: Forward primer, URP: Universal reverse primer

**Table 2. Sequences and the nomenclature of probe and Accession strain.**

| H A | Probe    | Subtype | Accession | Host                                                  | Reference Strains                                        | Country   | Year                                                 |
|-----|----------|---------|-----------|-------------------------------------------------------|----------------------------------------------------------|-----------|------------------------------------------------------|
| H5  | H5N3     | H5N3    | AB241626  | Avian                                                 | Influenza A virus<br>(A/duck/Hokkaido/299/04(H5N3))      | Japan     | 2004                                                 |
|     |          | H5N3    | AB241626  |                                                       | feces/Korea/CSM2/02 (H5N3)                               | S.Korea   | 2002                                                 |
|     | H5N1     | H5N1    | GU186680  | Avian                                                 | Influ. A (A/environment/Hong Kong/674.15/2002-H5N1)      | Hong Kong | 2002                                                 |
|     |          | H5N1    | GU052019  |                                                       | Influenza A virus (A/goose/Hong Kong/437-6/1999-H5N1)    | Hong Kong | 1999                                                 |
|     |          | H5N1    | AY075027  |                                                       | Influenza A virus (A/Chicken/Hong Kong/317/2001-H5N1)    | Hong Kong | 2001                                                 |
|     |          | H5N1    | AB212054  |                                                       | Influenza A virus (A/Hong Kong/213/2003(H5N1))           | Hong Kong | 2003                                                 |
|     |          | H5N1    | FJ265565  |                                                       | Influenza A virus<br>(A/quail/Thailand/Phichit-1/2004)   | Thailand  | 2004                                                 |
|     |          | H5N1    | EF541415  |                                                       | Influenza A virus<br>(A/chicken/Laos/44/2004(H5N1))      | Laos      | 2002                                                 |
|     |          | H5N1    | EF473081  |                                                       | Influenza A virus<br>(A/chicken/Indonesia/11/2003(H5N1)) | Indonesia | 2005                                                 |
|     |          | H5N1    | EF541404  |                                                       | Influenza A virus (A/Viet Nam/1204/2004(H5N1))           | Viet Nam  |                                                      |
|     |          | H5N1    | AY585368  |                                                       | Influenza A virus<br>(A/duck/Shanghai/35/2002(H5N1))     | China     | 2008                                                 |
|     |          | H5N1    | CY021397  |                                                       | Influenza A virus<br>(A/mallard/Italy/3401/2005(H5N1))   | Italy     | 2006-2007                                            |
|     |          | H5N1    | GU052473  |                                                       | Influenza A virus<br>(A/avian/Italy/1485/1997(H5N1))     | Italy     |                                                      |
|     |          | H5N1    | AM408214  |                                                       | Influenza A virus<br>(A/teal/Germany/WV632/2005(H5N1))   | Germany   |                                                      |
|     |          | H5N1    | AJ971297  |                                                       | Influenza A virus<br>(A/duck/France/05066b/2005(H5N1))   | France    |                                                      |
|     |          | H5N1    | CY046182  |                                                       | Influenza A virus<br>(A/duck/France/080036/2008(H5N1))   | France    |                                                      |
|     |          | H5N1    | AB355929  |                                                       | Influenza A virus (A/duck/Hokkaido/Vac-3/2007(H5N1))     | Japan     |                                                      |
|     |          | H5N1    | AB530992  |                                                       | Influenza A virus (A/duck/Hokkaido/Vac-3/2007(H5N1))     | Japan     |                                                      |
|     |          | H5N1    | DQ767725  |                                                       | Influenza A virus<br>(A/chicken/Shandong/K01/2004(H5N1)) | China     |                                                      |
|     |          | H5N1(K) | H5N1      |                                                       | EU233675                                                 | Avian     | Influenza A virus<br>(A/chicken/Korea/IS/2006(H5N1)) |
|     | EU233683 |         |           | Influenza A virus<br>(A/chicken/Korea/IS2/2006(H5N1)) | South Korea                                              |           | 2008                                                 |
|     | EU233739 |         |           | Influenza A virus<br>(A/environment/Korea/W150/2006)  | South Korea                                              |           | 2008                                                 |
|     | EU233723 |         |           | Influenza A virus<br>(A/quail/Korea/KJ4/2006(H5N1))   | South Korea                                              |           | 2008                                                 |
|     | EU233699 |         |           | Influenza A virus<br>(A/chicken/Korea/IS3/2006(H5N1)) | South Korea                                              |           | 2008                                                 |
|     | GQ412053 |         |           | Influenza A virus<br>(A/chicken/Korea/Gimje/08)       | South Korea                                              |           |                                                      |
|     | GQ412056 |         |           | Influenza A virus                                     |                                                          |           |                                                      |

|      |          |          |                                                          |                                                        |                                                                                                                                                                                                                                                                                             |                                                                         |                                      |
|------|----------|----------|----------------------------------------------------------|--------------------------------------------------------|---------------------------------------------------------------------------------------------------------------------------------------------------------------------------------------------------------------------------------------------------------------------------------------------|-------------------------------------------------------------------------|--------------------------------------|
|      |          | H5N1     | GQ412055                                                 |                                                        | (A/chicken/Korea/YAQ173/2008)<br>Influenza A virus                                                                                                                                                                                                                                          |                                                                         |                                      |
|      |          | H5N1     | GQ412052                                                 |                                                        | (A/chicken/Korea/USQ284/2008)<br>Influenza A virus                                                                                                                                                                                                                                          |                                                                         |                                      |
|      |          | H5N1     | GQ412051                                                 |                                                        | (A/duck/Korea/JEQ149/2008(H5N1))<br>Influenza A virus<br>(A/chicken/Korea/ISQ250/2008(H5N1))                                                                                                                                                                                                |                                                                         |                                      |
| H7   | H7N1     | H7N1     | AJ493472                                                 | Avian                                                  | Influenza A virus (A/turkey/Italy/3775/99<br>(H7N1)                                                                                                                                                                                                                                         | Italy                                                                   | 1999                                 |
|      |          | H7N1     | CY025189                                                 | Avian                                                  | Influenza A virus<br>(A/turkey/Italy/1265/1999(H7N1)                                                                                                                                                                                                                                        | Italy                                                                   | 1999                                 |
|      |          | H7N1     | GU052976                                                 |                                                        | Influenza A virus<br>(A/turkey/Italy/3283/1999(H7N1)                                                                                                                                                                                                                                        | Italy                                                                   | 2002                                 |
|      | H7N3     | H7N3     | FLAAHAX                                                  | Avian                                                  | Influenza A virus (A/turkey/Oregon/71<br>(H7N3)                                                                                                                                                                                                                                             | USA, Chile                                                              | 2002                                 |
|      | H7N7     | H7N7     | FJ750854<br>FJ750864<br>FJ750862<br>FJ750863<br>FJ767719 | Avian                                                  | Influenza A virus<br>(A/magpie/Korea/YJD174/2007(H7N7)<br>Influenza A virus<br>(A/mallard/Korea/GH170/2007(H7N7)<br>Influenza A virus<br>(A/mallard/Korea/GG2/2007(H7N7)<br>Influenza A virus<br>(A/mallard/Korea/GG3/2007(H7N7))<br>Influenza A virus<br>(A/mallard/Geumgang/1/2007(H7N7)) | South Korea<br>South Korea<br>South Korea<br>South Korea<br>South Korea | 2007<br>2007<br>2007<br>2007<br>2007 |
| H9   | H9N4     | H9N4     | AB455035                                                 | Avian                                                  | Influenza A virus (A/duck/Hokkaido/<br>HY57/2005(H9N4)                                                                                                                                                                                                                                      | Japan                                                                   | 2005                                 |
|      | H9N2     | H9N2     | AF508560                                                 | Avian                                                  | Influenza A virus<br>(A/Pheasant/Ireland/PV18/97(H9N2))                                                                                                                                                                                                                                     | Ireland                                                                 | 1997                                 |
|      |          | H9N2     | AJ781819                                                 |                                                        | Influenza A virus<br>(A/turkey/Germany/R113/95(H9N2))                                                                                                                                                                                                                                       | Germany                                                                 |                                      |
|      |          | H9N2     | AF508557                                                 |                                                        | Influenza A virus<br>(A/Duck/Germany/113/95(H9N2))                                                                                                                                                                                                                                          | Germany                                                                 |                                      |
|      |          | H9N2     | AJ781818                                                 |                                                        | Influenza A virus<br>(A/turkey/Germany/R90/95(H9N2))                                                                                                                                                                                                                                        | Germany                                                                 |                                      |
|      |          | H9N2     | CY041274                                                 |                                                        | Influenza A virus (A/Bewick's<br>swan/Netherlands/5/2007                                                                                                                                                                                                                                    | Netherland                                                              |                                      |
|      |          | H9N2     | CY024016                                                 |                                                        | Influenza A virus<br>(A/duck/Shantou/163/2004(H9N2))                                                                                                                                                                                                                                        | China                                                                   |                                      |
|      |          | H9N2     | AF156377                                                 |                                                        | Influenza A virus (A/Duck/Hong<br>Kong/Y439/97(H9N2))                                                                                                                                                                                                                                       | Hong Kong                                                               |                                      |
| H9N2 | AB538969 |          | Influenza A virus<br>(A/duck/Mongolia/564/2003(H9N2))    | Mongolia                                               |                                                                                                                                                                                                                                                                                             |                                                                         |                                      |
| H9N6 | H9N6     | AY206671 | Avian                                                    | Influenza A virus (A/duck/Hong<br>Kong/147/1977(H9N6)) | Hong Kong                                                                                                                                                                                                                                                                                   | 1977                                                                    |                                      |

#### 4. Generalized probe selection method:

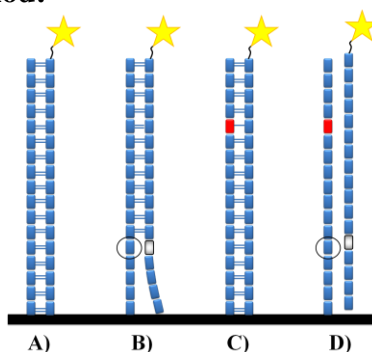

**Scheme S0:** Hybridizations of the immobilized probes with the Cy5 labeled target DNAs A) original probe-target specific hybridization, B) original probe-target non-target hybridization, C) original probe (with one artificial mutation)-target specific hybridization, D) original probe (with one artificial mutation)-target no non-target hybridization

#### 5. Methods and experimental procedures:

##### 5a. Typical method for the preparation of the pre-HPAI 9G DNAChip and the HPAI 9G DNAChip:

The pre-HPAI 9G DNAChip and the HPAI 9G DNAChips were prepared by spotting the immobilization solution containing oligonucleotide probes Probe1-Probe9 and Probe10-Probe18, respectively, with the microarrayer, and the spots were arranged to make 6 by 3 pixels on the 9G slides. The microarrayed 9G slides were then kept in the incubator (25<sup>0</sup>C, 50% humidity) for 4h to immobilize the oligonucleotides. The slides were then suspended in the blocking buffer solution at 25<sup>0</sup>C for 30 min, in order to remove the excess oligonucleotides and to deactivate the non-spotted area. Then the slides were rinsed with washing buffer solutions A and B for 5min each, and then dried with commercial centrifuge to obtain the pre-HPAI 9G DNAChip and the HPAI 9G DNAChip. Before hybridization, the pre-HPAI 9G DNAChip and the HPAI 9G DNAChip were covered with Secure-Seal<sup>TM</sup> hybridization chambers.

##### 5b. Typical hybridization and washing method:

Hybridizations were done by using the 100fmol of the Cy5 labeled PCR products of the 9 HPAI genotypes at 25<sup>0</sup>C for 30min in the commercial incubator. Then pre-HPAI 9G DNAChip (or the HPAI 9G DNAChip) was rinsed with washing buffer solutions A and B successively for 2 min each, in order to remove the excess target DNA, and dried with commercial centrifuge (1000 rpm). The fluorescence signal of the microarray was measured on ScanArrayLite, and the images were analyzed by Quant Array software (Packard Bioscience).

### 5c. Amplification of the HPAI Gene:

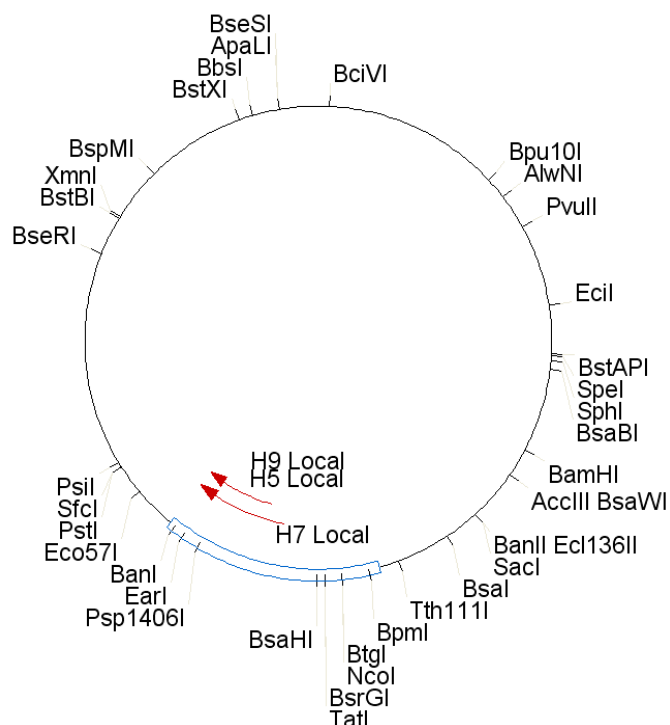

**Figure S1:** Genomic map with different regions on the HPAI genotype, H5, H7, H9 gene position lies between the 700-1055.

### 5d. Amplification of HPAI RNA by RT-PCR:

The H5, H7, H9 genotype samples were amplified by RT-PCR to generate amplicons of approximately 166bp, 280bp and 135bp. HPAI RNA was amplified with the multiplex primer set containing U1055R (Universal reverse primer) and H5, H7, and H9 (forward primer) (**Table S1**). 10 $\mu$ l of the HPAI RNA sample, 10 $\mu$ l (20pmol/ $\mu$ l) of U1055R, and 10 $\mu$ l (10pmol/ $\mu$ l) of 3 FP were added to the RT-PCR premix. All tubes were incubated for 2 min at 50°C before PCR was started. Amplification was performed with the following steps: reverse transcription at 50°C for 30min, transcriptase denaturation at 95°C for 5 min and then DNA polymerization for 45 cycles of 94°C for 15 s, 57°C for 30 s, and 72°C. Then 5 $\mu$ l of PCR product was subjected to agarose gel electrophoresis, using a 2% agarose standard run in 1X Tris borate EDTA (Figure S2). 5 $\mu$ l of Cy5 labeled PCR product was used for the further experiments.

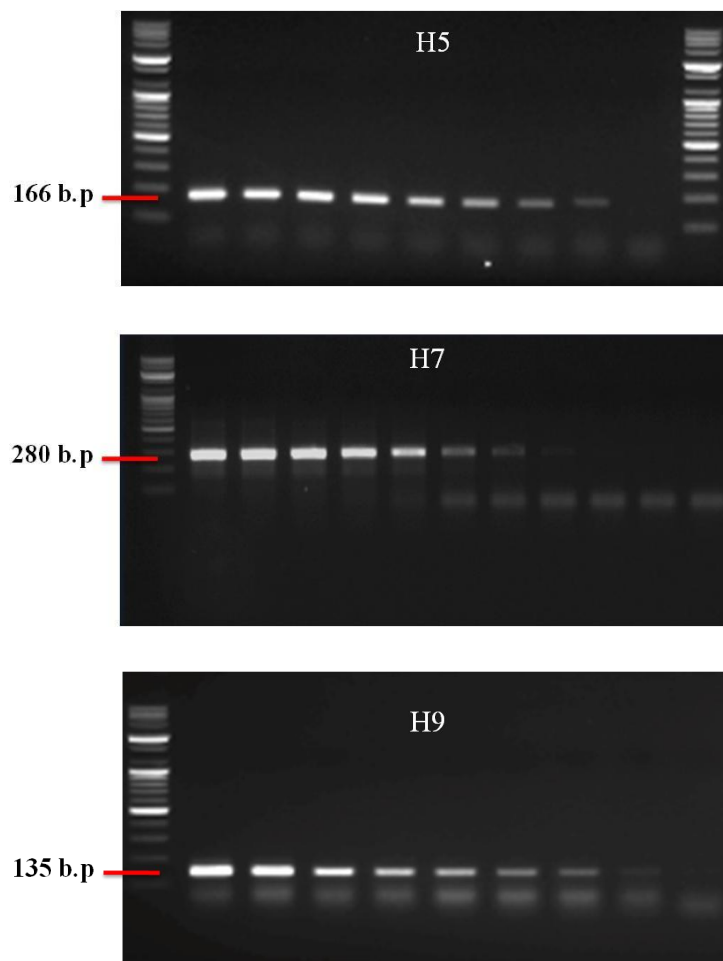

**Figure S2.** Electrophoresis gel images of HPAI RT-PCR products



## 6. Results for hybridization of the probes (without ARTIFICIAL mutations)

### 6a. Hybridization with Cy5 labeled PCR product of H5N3

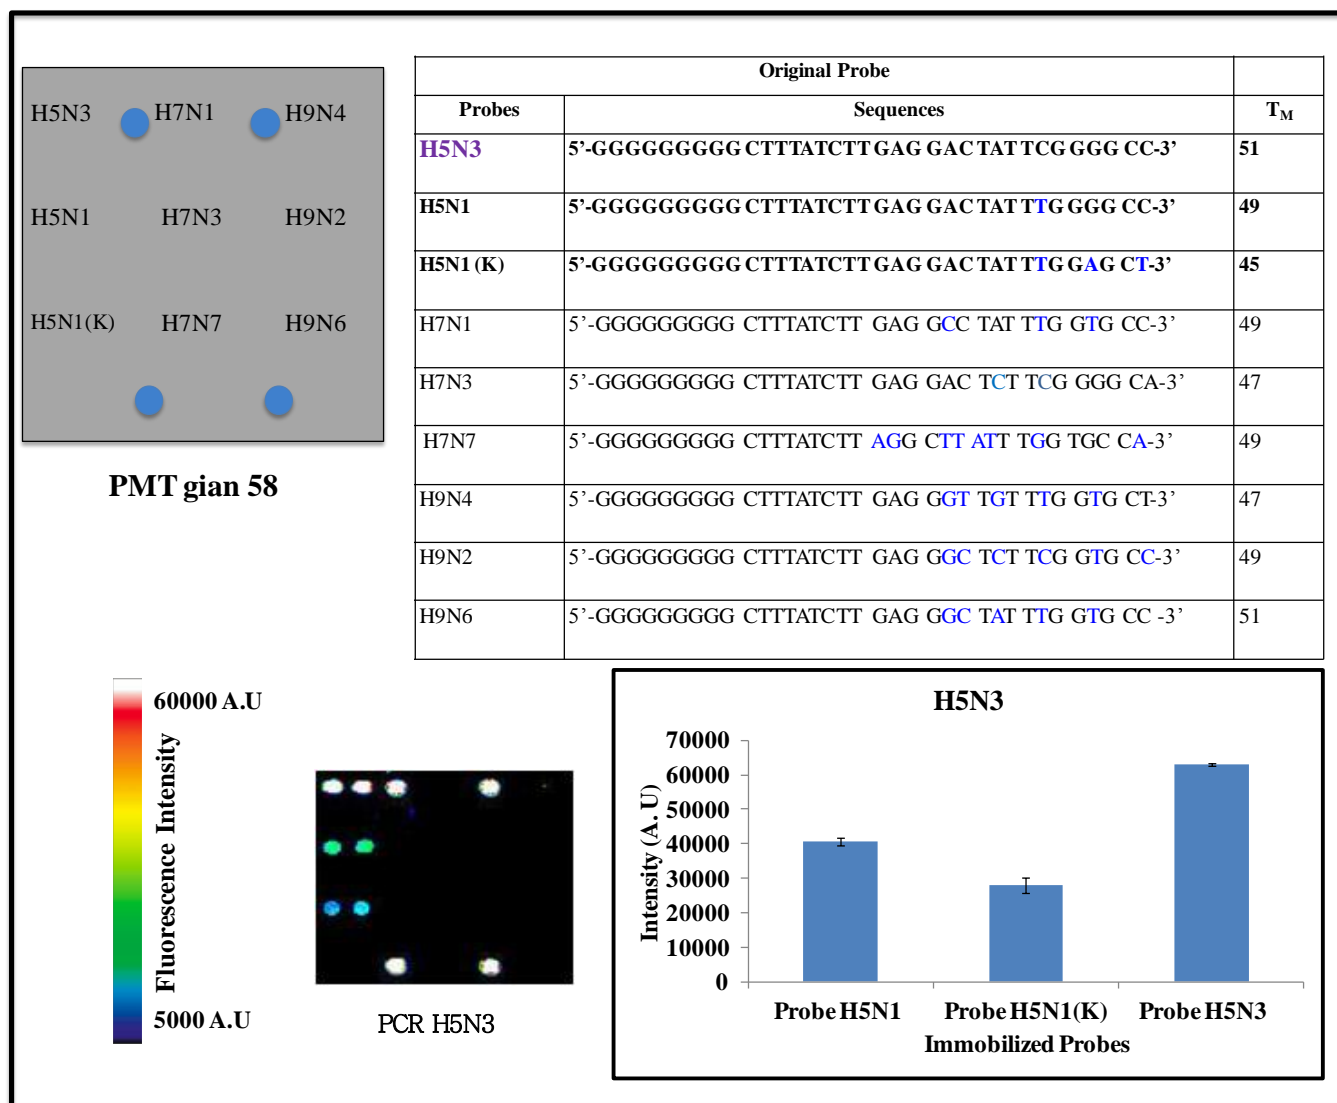

**Figure S3:** Fluorescence image after hybridization of Pre-HPAI 9GDNAChip with Cy5 labeled PCR product of H5N3. PMT gain = 58.

### 6b. Hybridization with Cy5 labeled PCR product of H5N1

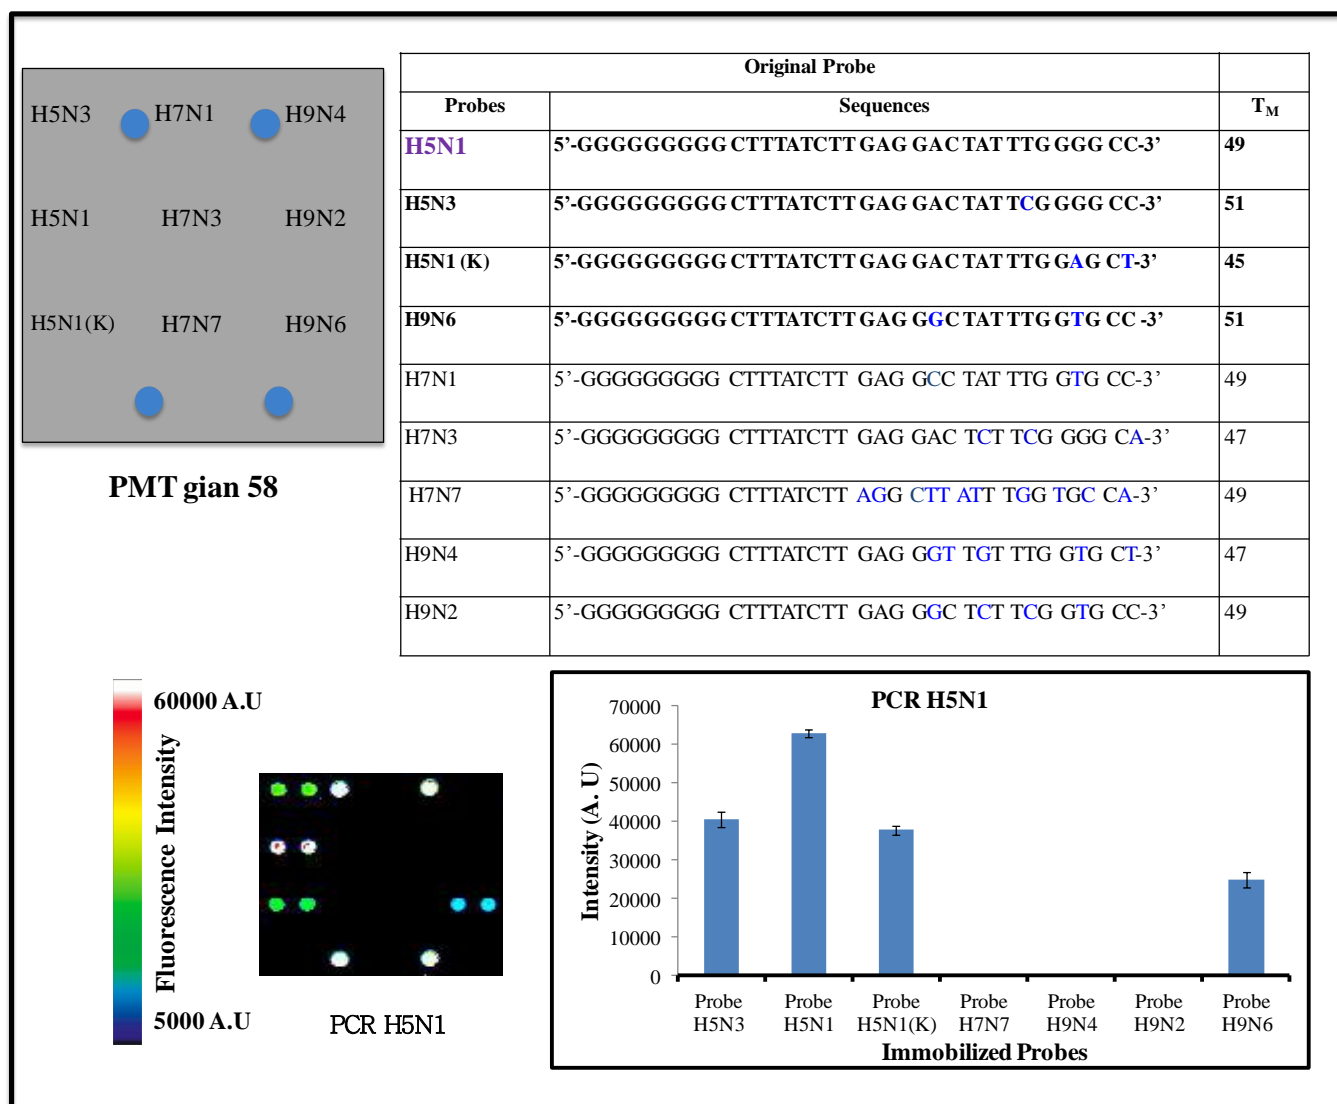

**Figure S4:** Fluorescence image after hybridization of Pre-HPAI 9GDNAChip with Cy5 labeled PCR product of H5N1. PMT gain = 58.

### 6c. Hybridization with Cy5 labeled PCR product of H5N1 (K)

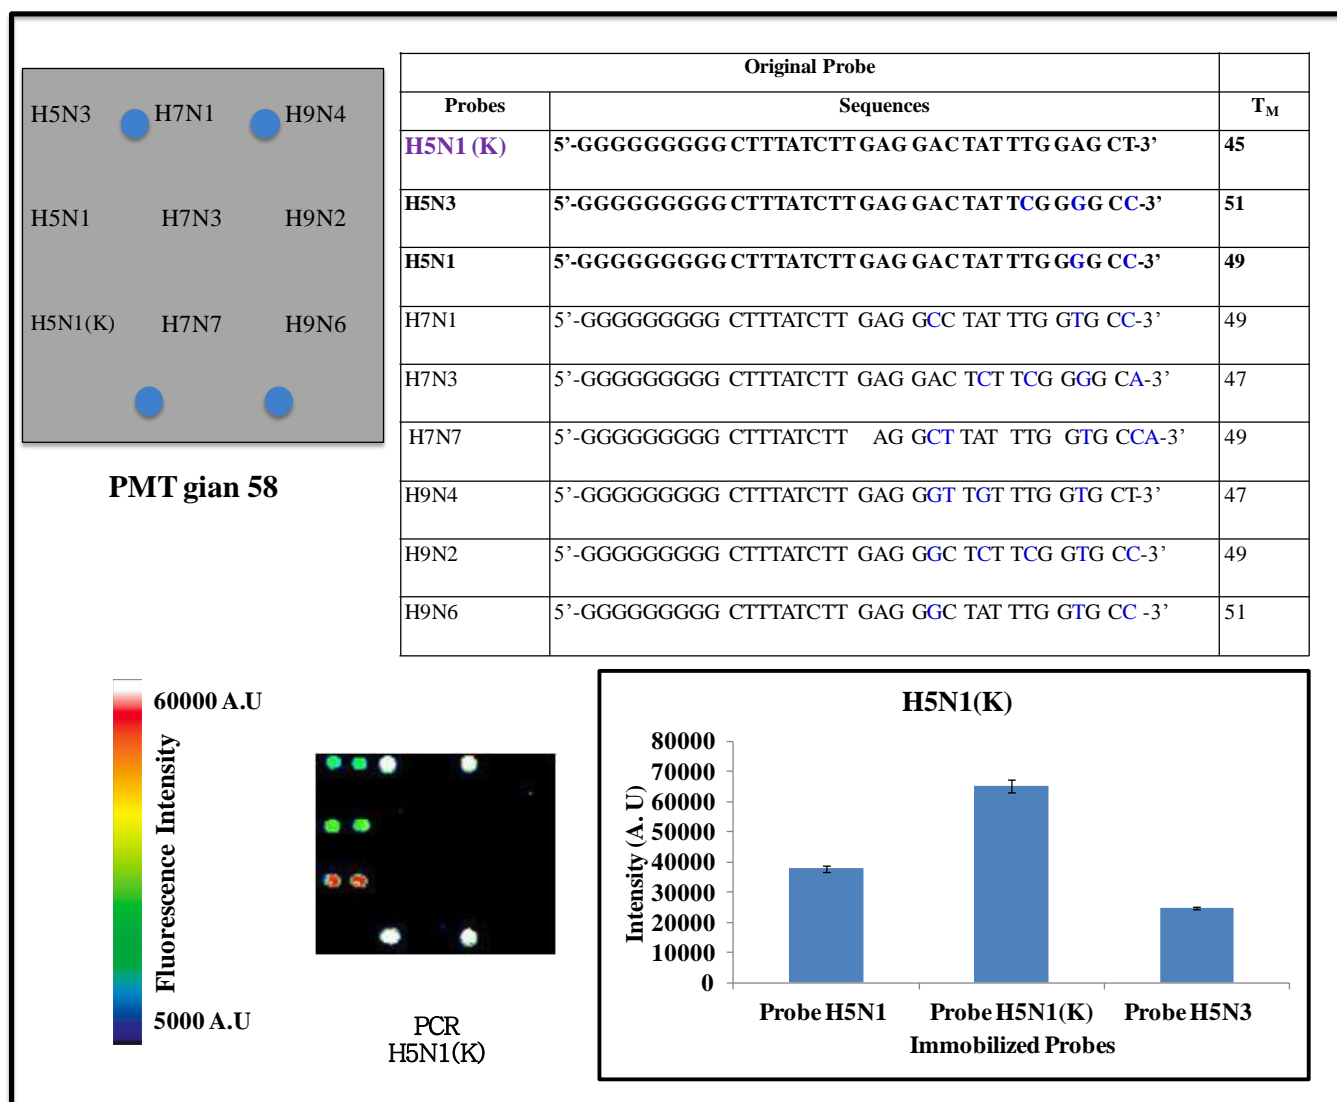

**Figure S5:** Fluorescence image after hybridization of Pre-HPAI 9GDNAChip with Cy5 labeled PCR product of H5N1 (K). PMT gain = 58.

### 6d. Hybridization with Cy5 labeled PCR product of H7N7

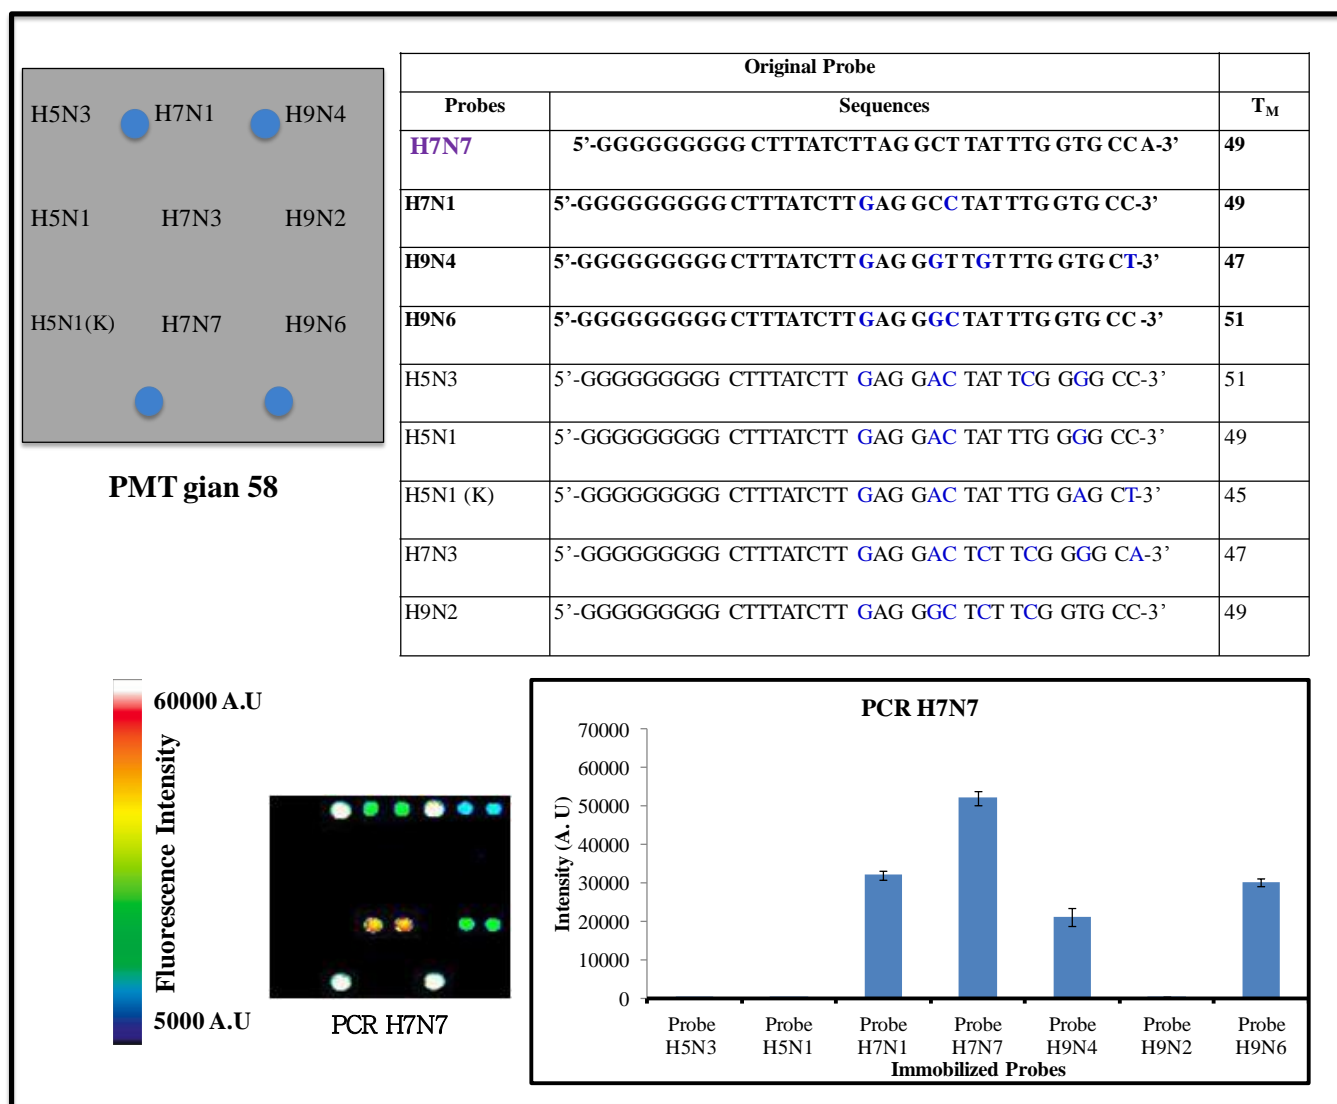

**Figure S6:** Fluorescence image after hybridization of Pre-HPAI 9GDNAChip with Cy5 labeled PCR product of H7N7. PMT gain = 58.

## 6e. Hybridization with Cy5 labeled PCR product of H9N4

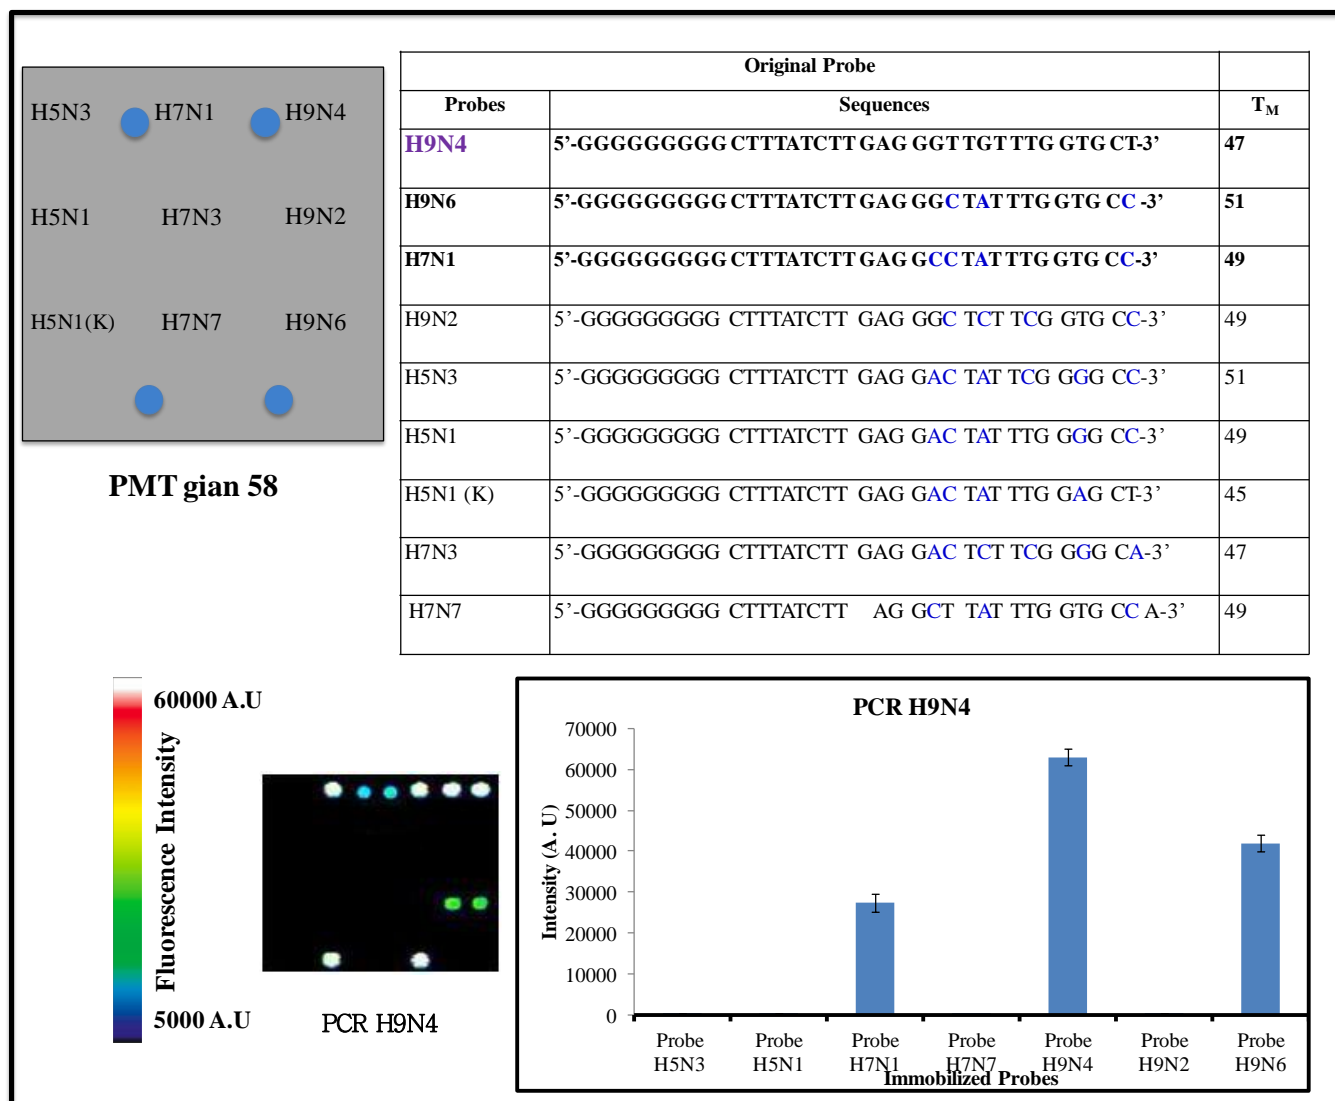

**Figure S7:** Fluorescence image after hybridization of Pre-HPAI 9GDNAChip with Cy5 labeled PCR product of H9N4. PMT gain = 58.

### 6f. Hybridization with Cy5 labeled PCR product of H9N2

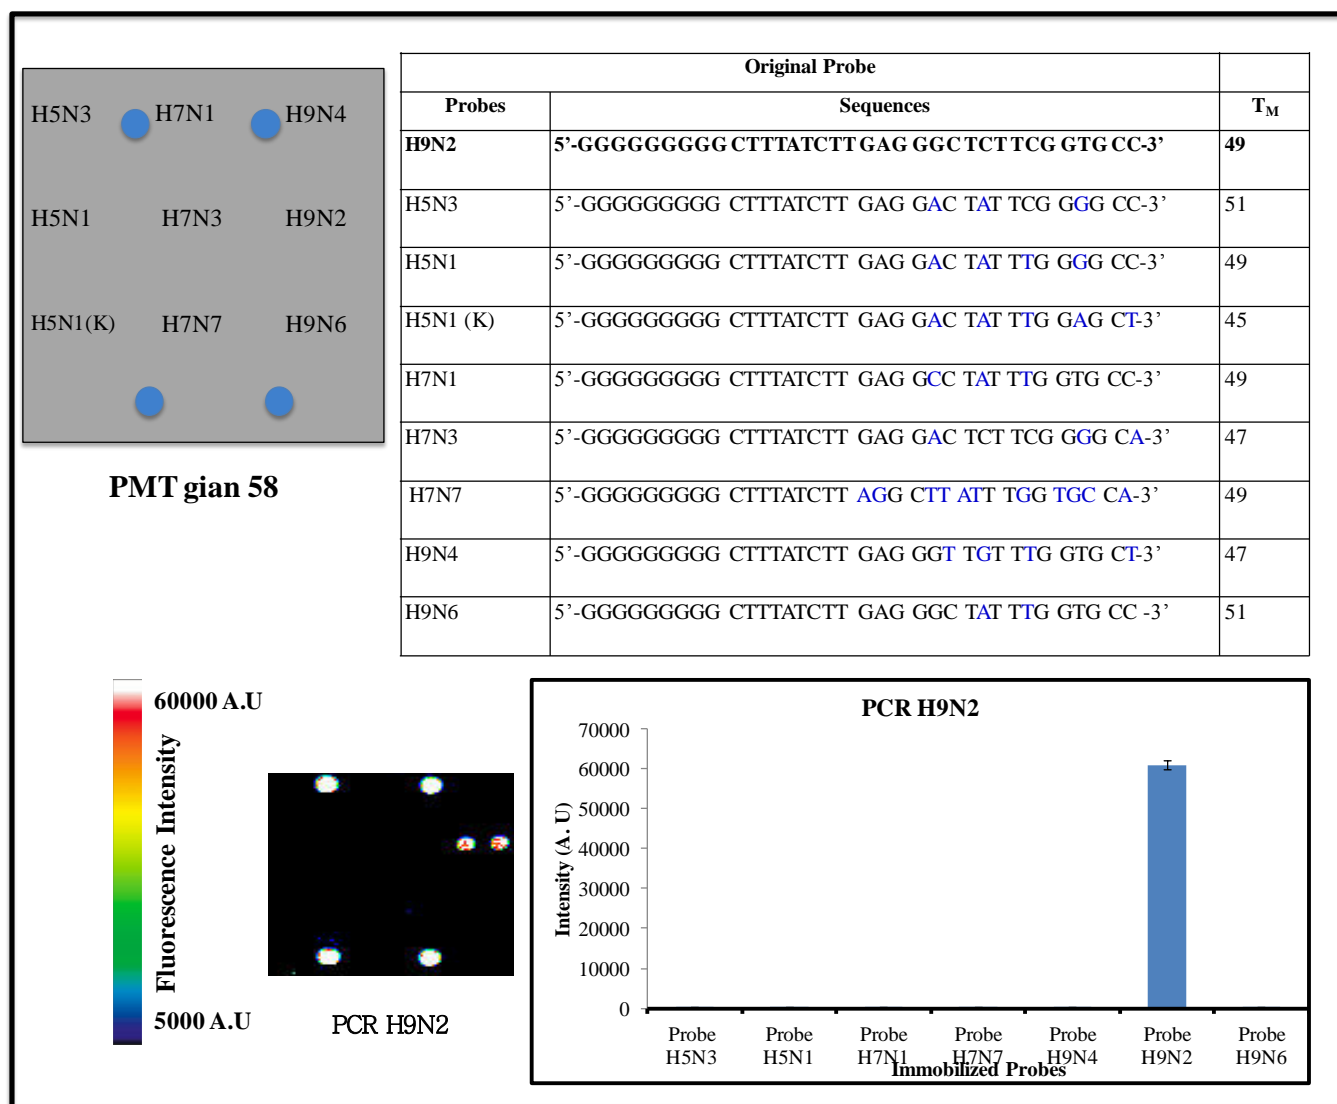

**Figure S8:** Fluorescence image after hybridization of Pre-HPAI 9GDNAChip with Cy5 labeled PCR product of H9N2. PMT gain = 58.

### 6g. Hybridization with Cy5 labeled PCR product of H9N6

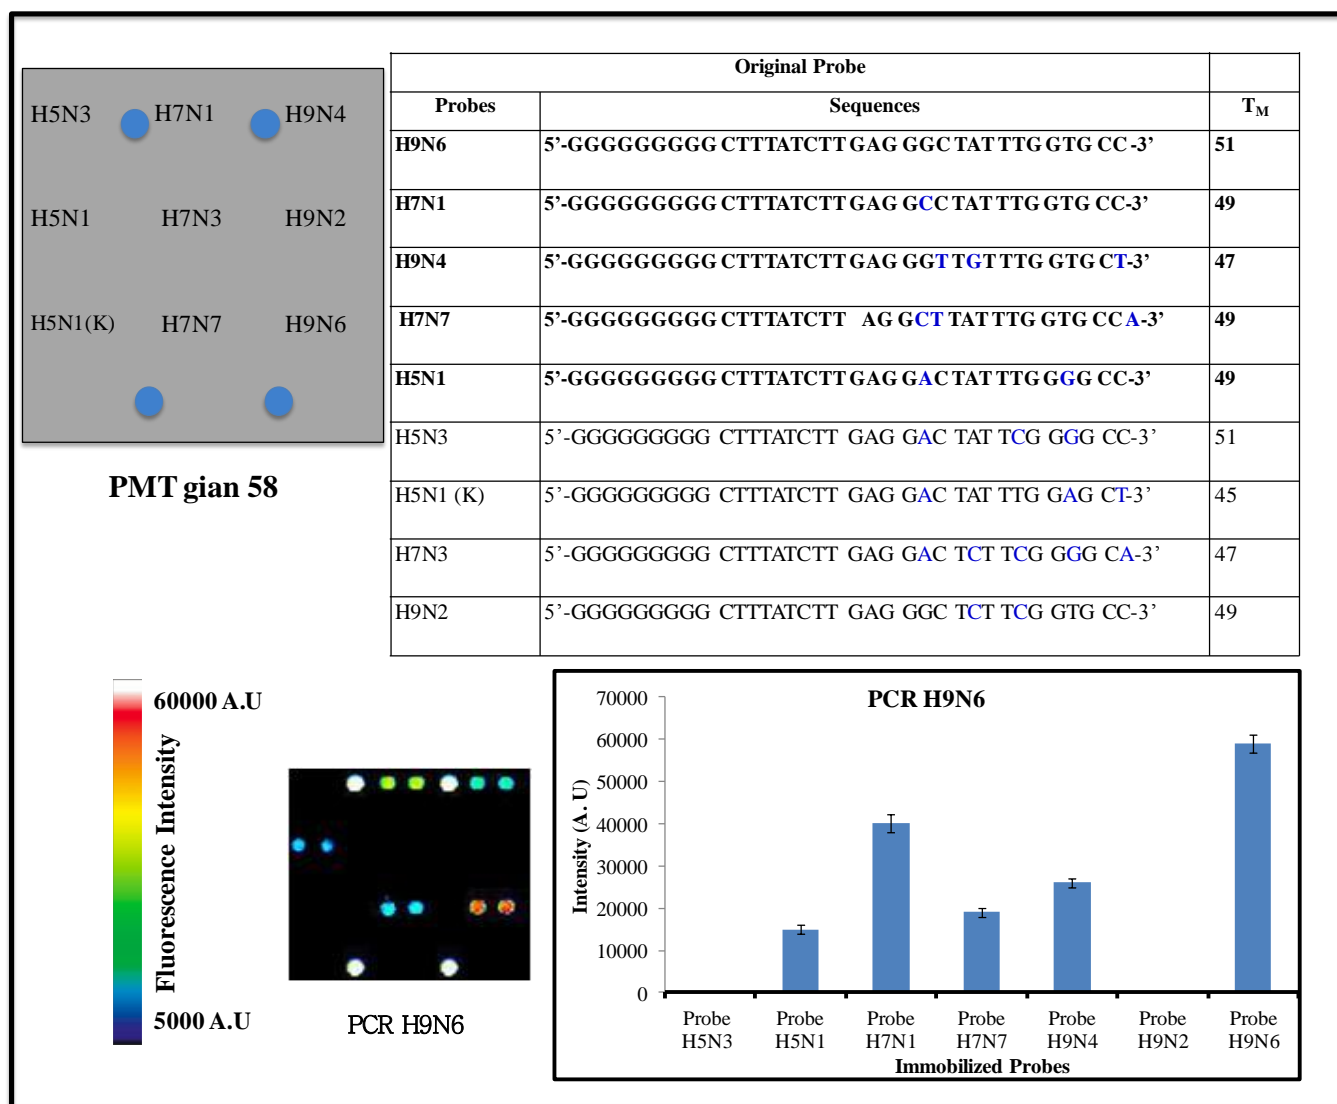

**Figure S9:** Fluorescence image after hybridization of Pre-HPAI 9GDNAChip with Cy5 labeled PCR product of H9N6. PMT gain = 58.

## 7. Results for hybridization of the probes (with one artificial mutations)

### 7a. Hybridization with Cy5 labeled PCR product of H5N3

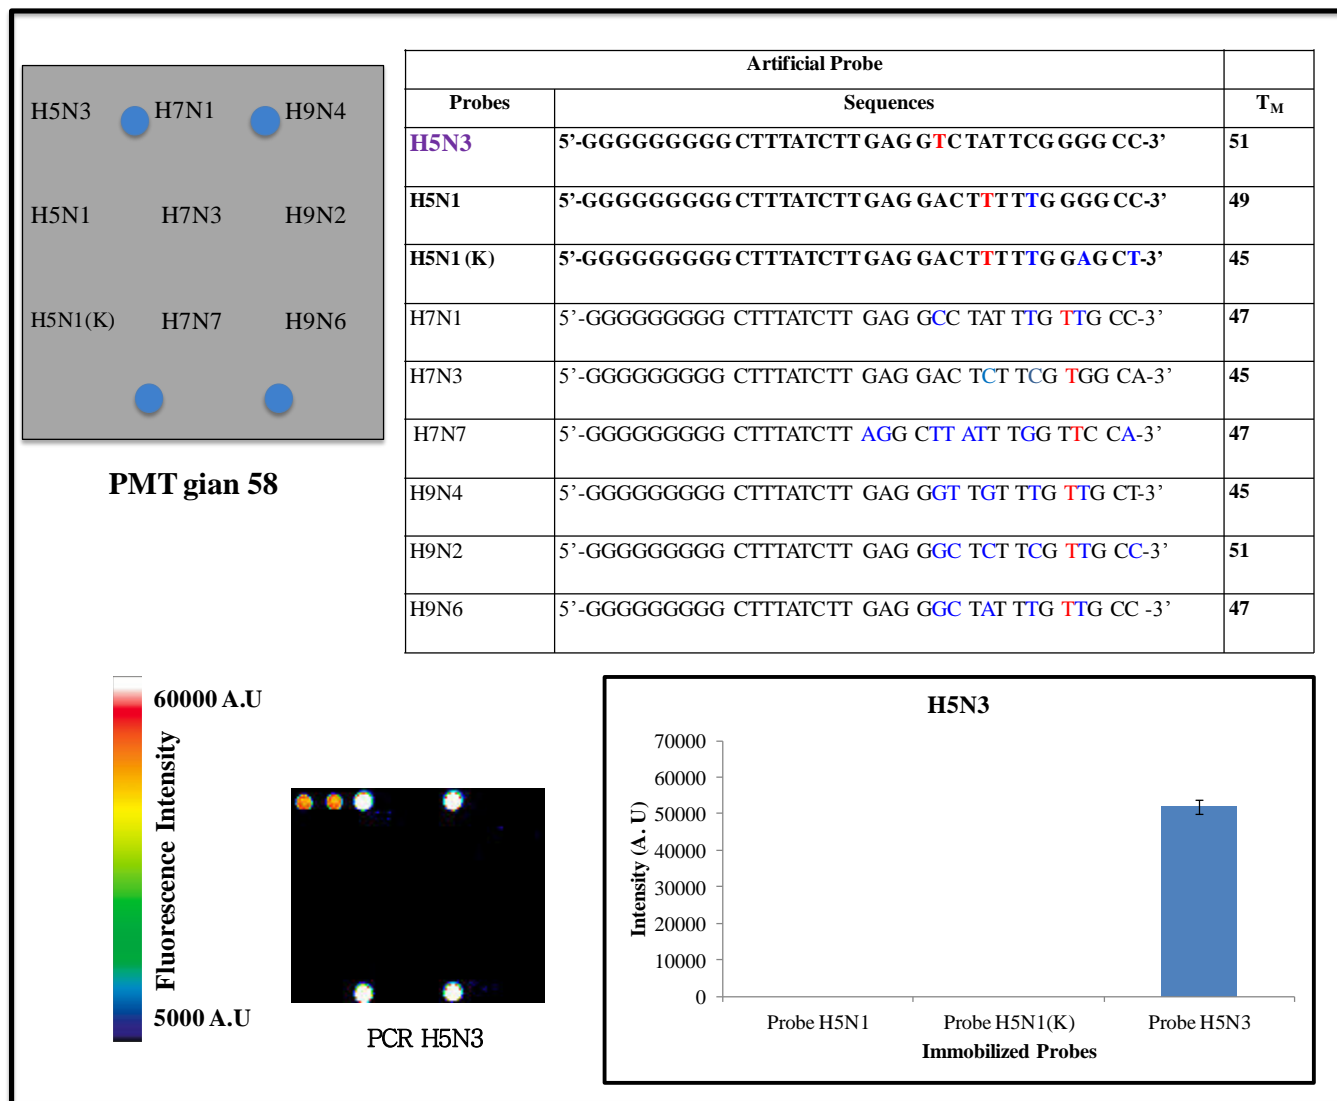

**Figure S10:** Fluorescence image after hybridization of final HPAIN 9GDNAChip with Cy5 labeled PCR product of H5N3. PMT gain = 58.



## 7b. Hybridization with Cy5 labeled PCR product of H5N1

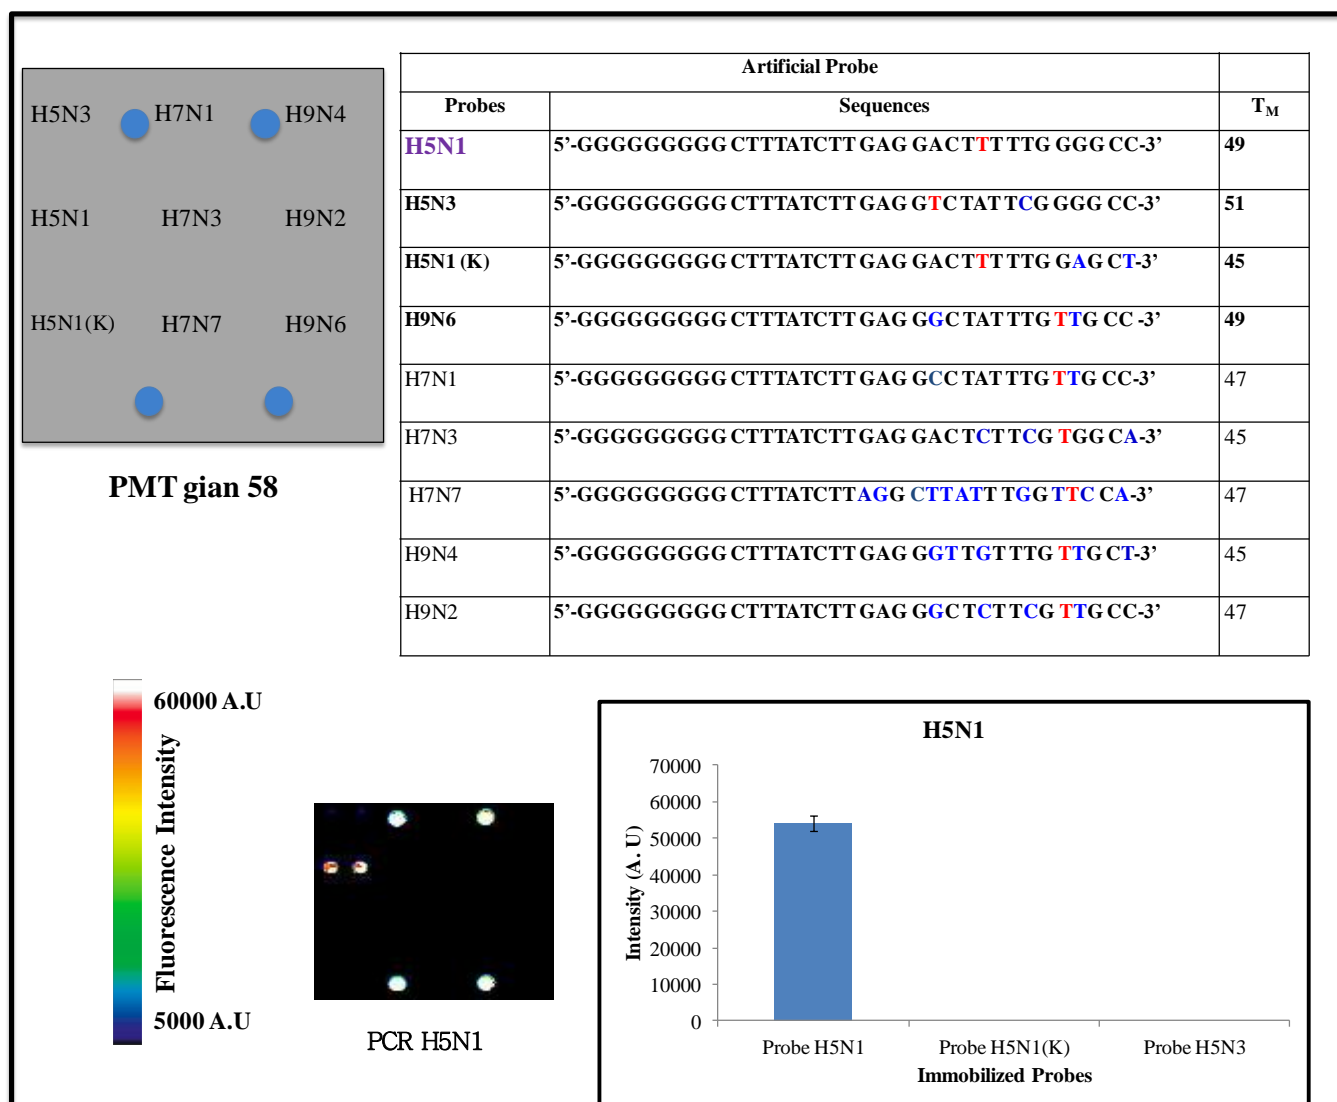

**Figure S11:** Fluorescence image after hybridization of final HPAI 9GDNAChip with Cy5 labeled PCR product of H5N1. PMT gain = 58.

### 7c. Hybridization with Cy5 labeled PCR product of H5N1(K)

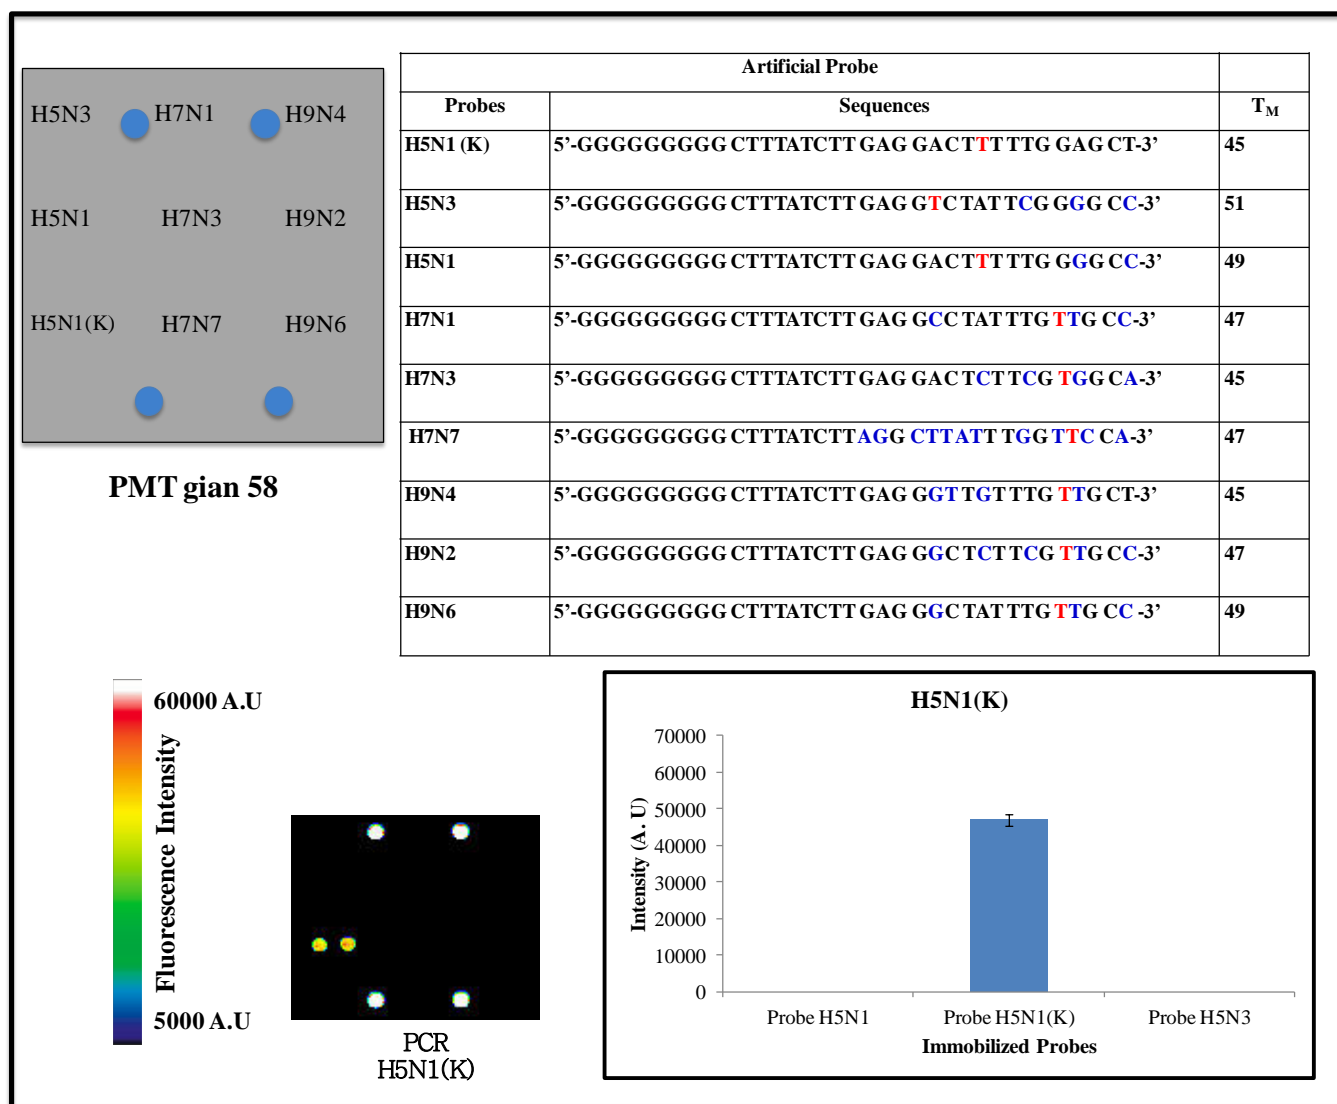

**Figure S12:** Fluorescence image after hybridization of final HPAI 9GDNAChip with Cy5 labeled PCR product of H5N1(K). PMT gain = 58.

### 7d. Hybridization with Cy5 labeled PCR product of H7N7

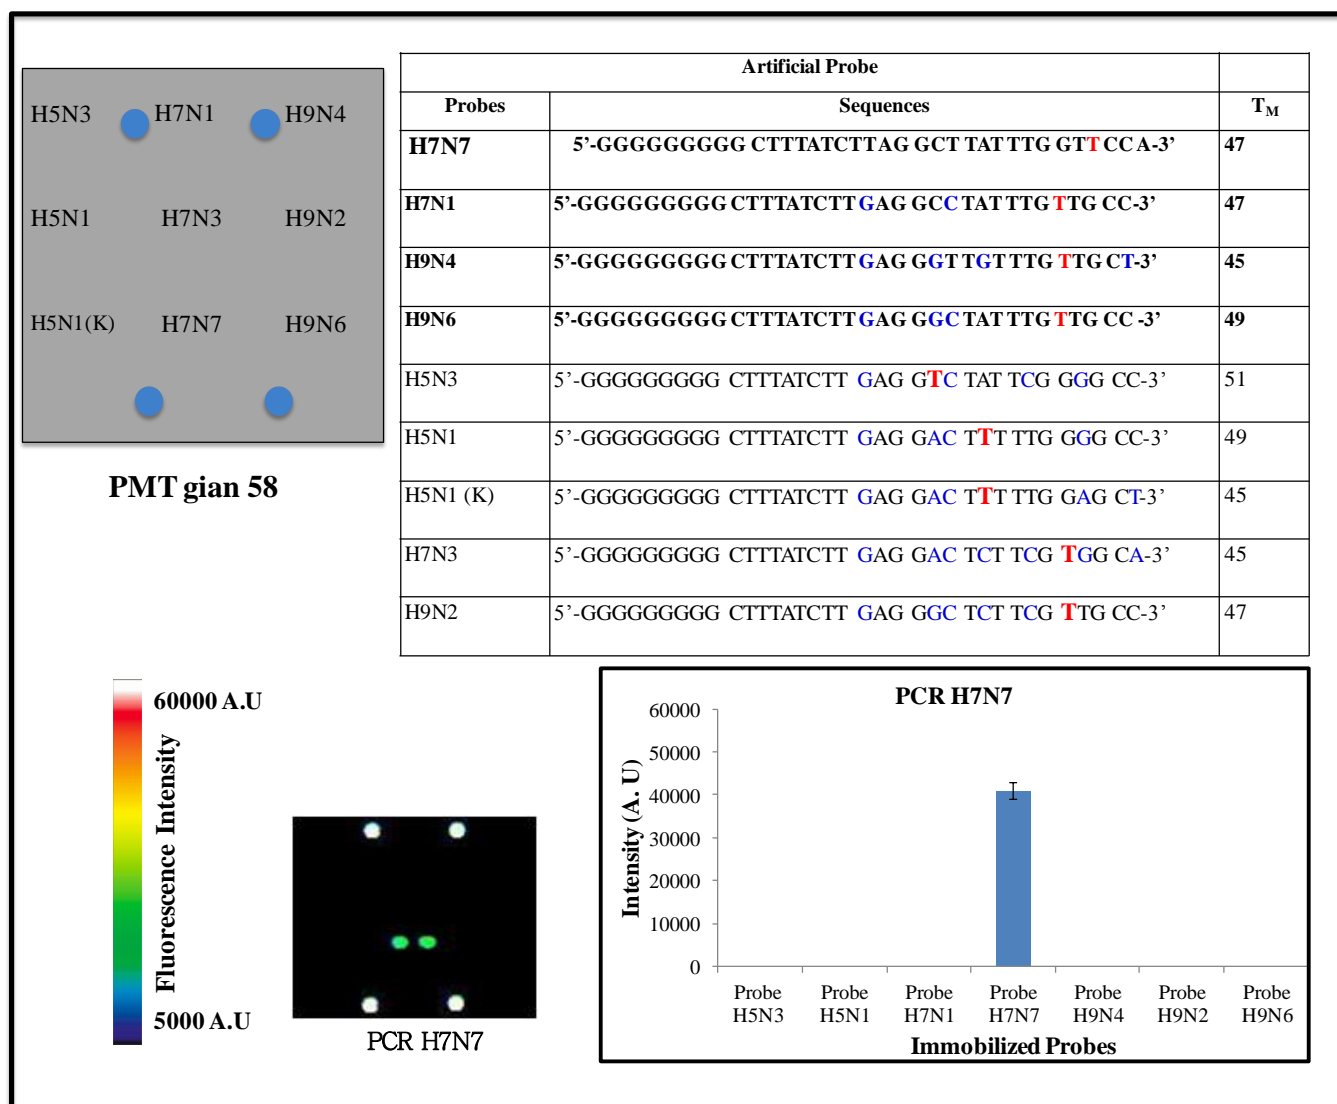

**Figure S13:** Fluorescence image after hybridization of final HPAI 9GDNAChip with Cy5 labeled PCR product of H7N7. PMT gain = 58.

### 7e. Hybridization with Cy5 labeled PCR product of H9N4

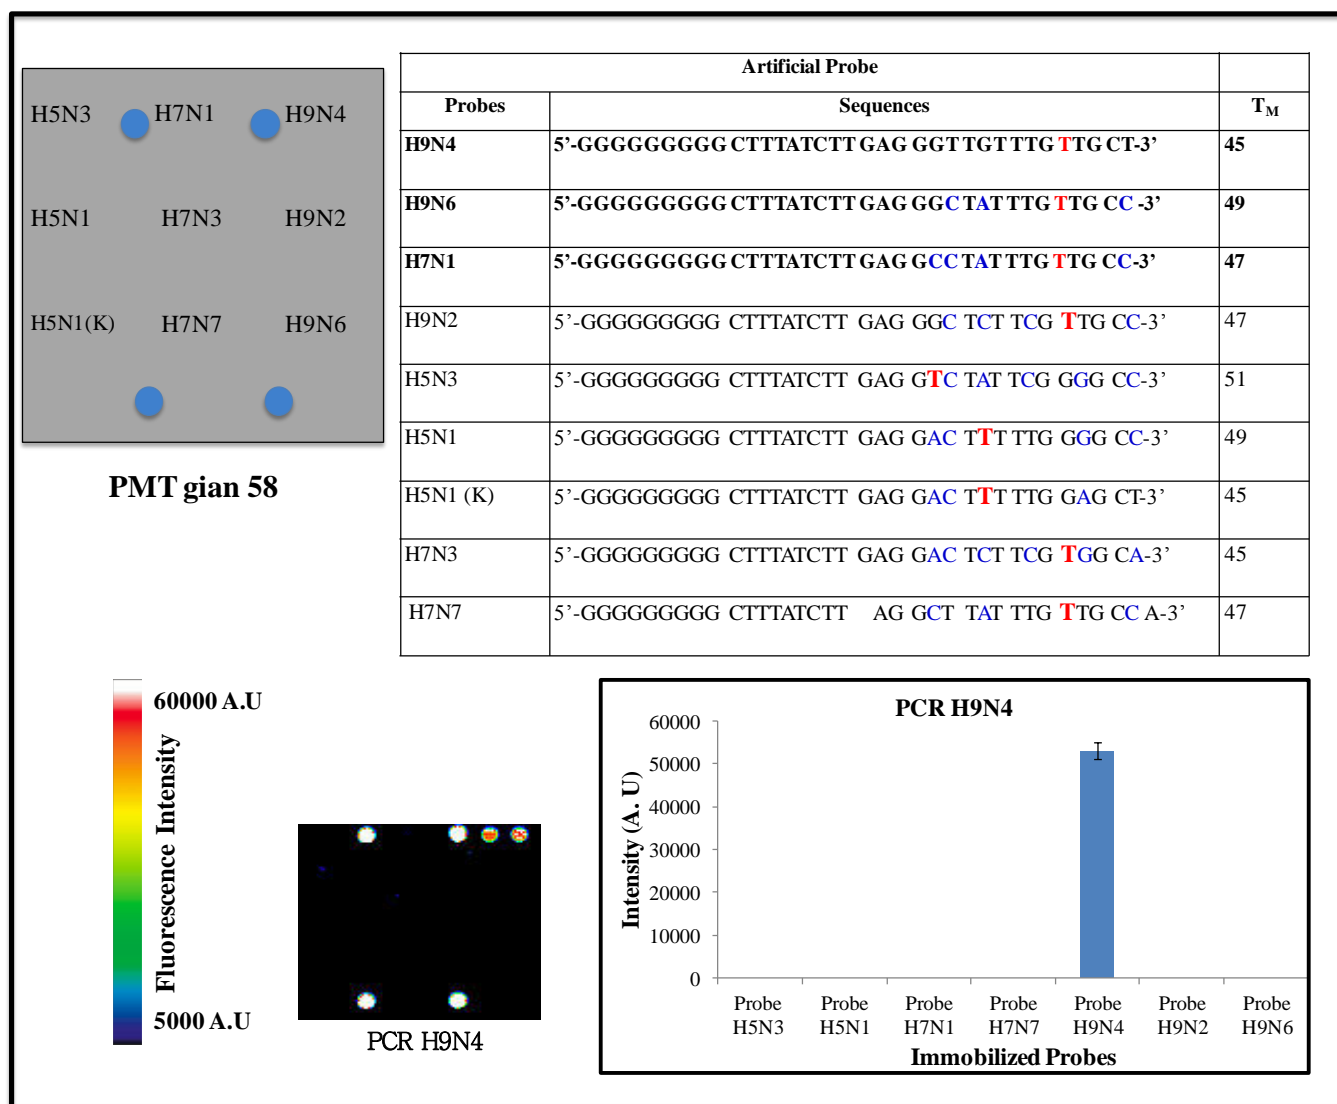

**Figure S14:** Fluorescence image after hybridization of final HPAI 9GDNAChip with Cy5 labeled PCR product of H9N4. PMT gain = 58.

## 7f. Hybridization with Cy5 labeled PCR product of H9N2

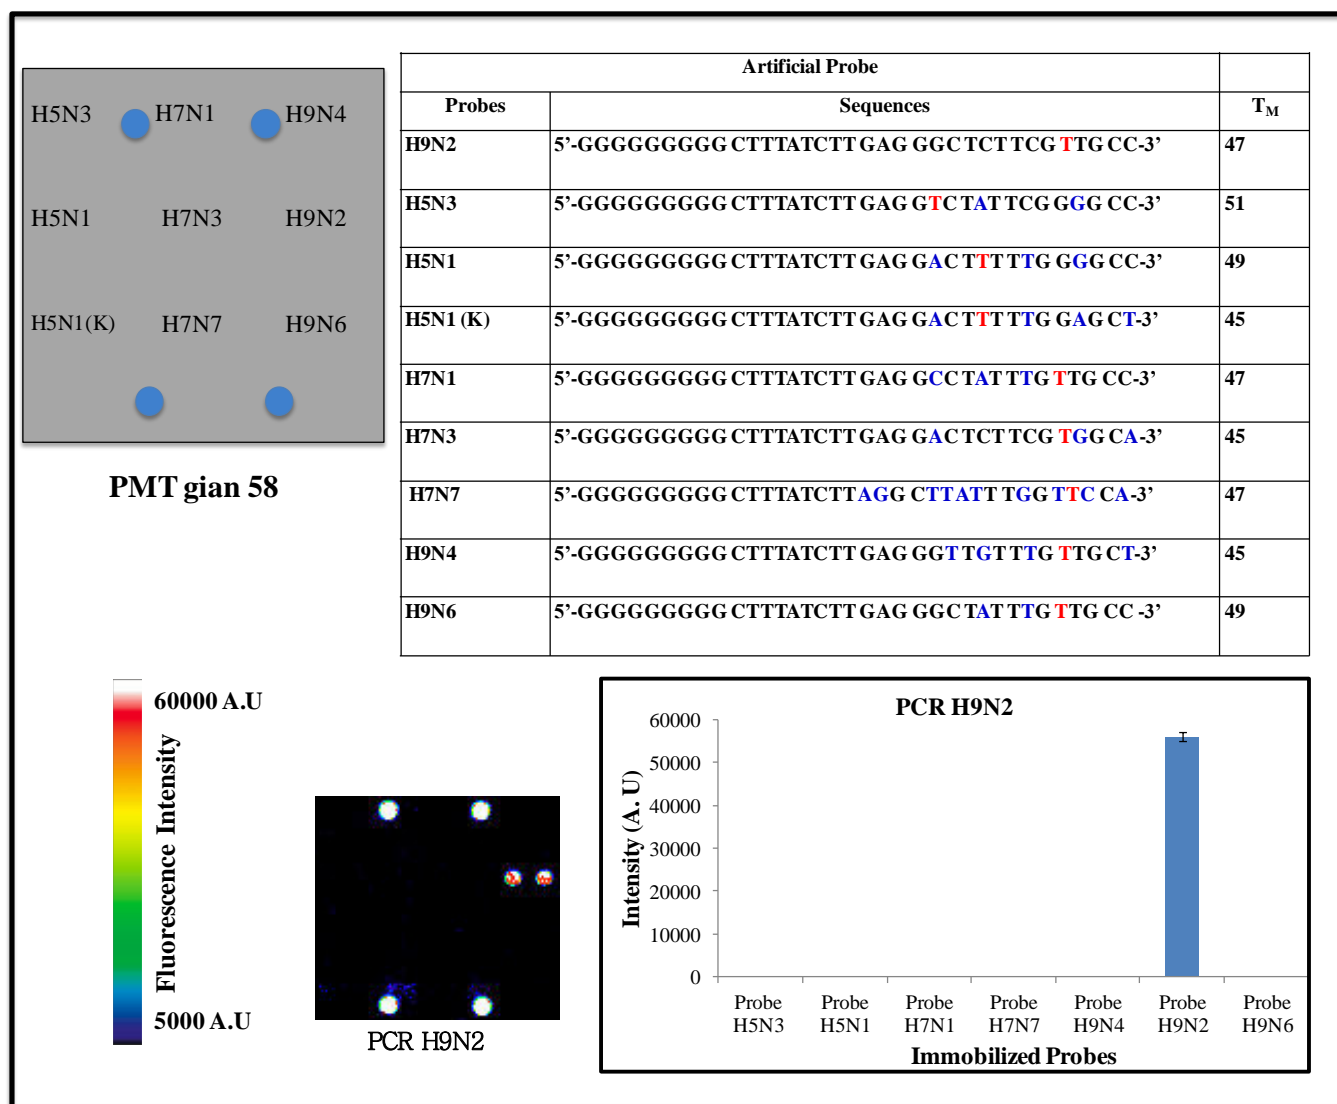

**Figure S15:** Fluorescence image after hybridization of final HPAI 9GDNAChip with Cy5 labeled PCR product of H9N2. PMT gain = 58.

### 7g. Hybridization with Cy5 labeled PCR product of H9N6

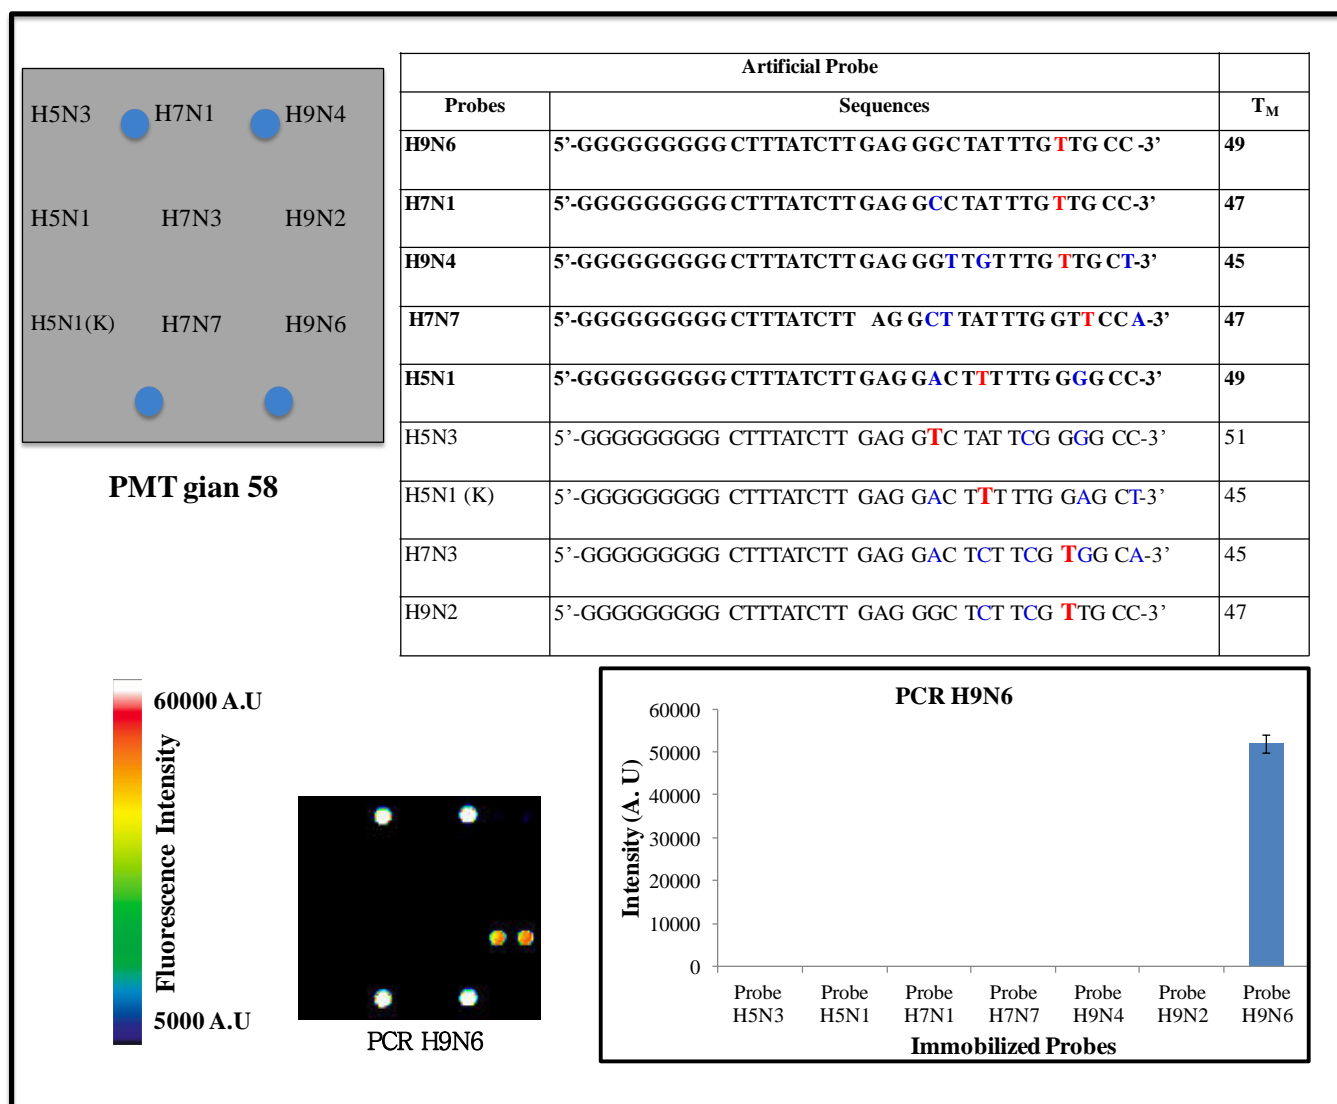

**Figure S16:** Fluorescence image after hybridization of final HPAI 9GDNAChip with Cy5 labeled PCR product of H9N6. PMT gain = 58.

## 8. Comparison of the results after hybridization of the original probes (without mutation) and final probes (with one artificial mutation)

### 8a. Hybridization with Cy5 labeled PCR products of H5N3, H5N1, and H5N1 (K)

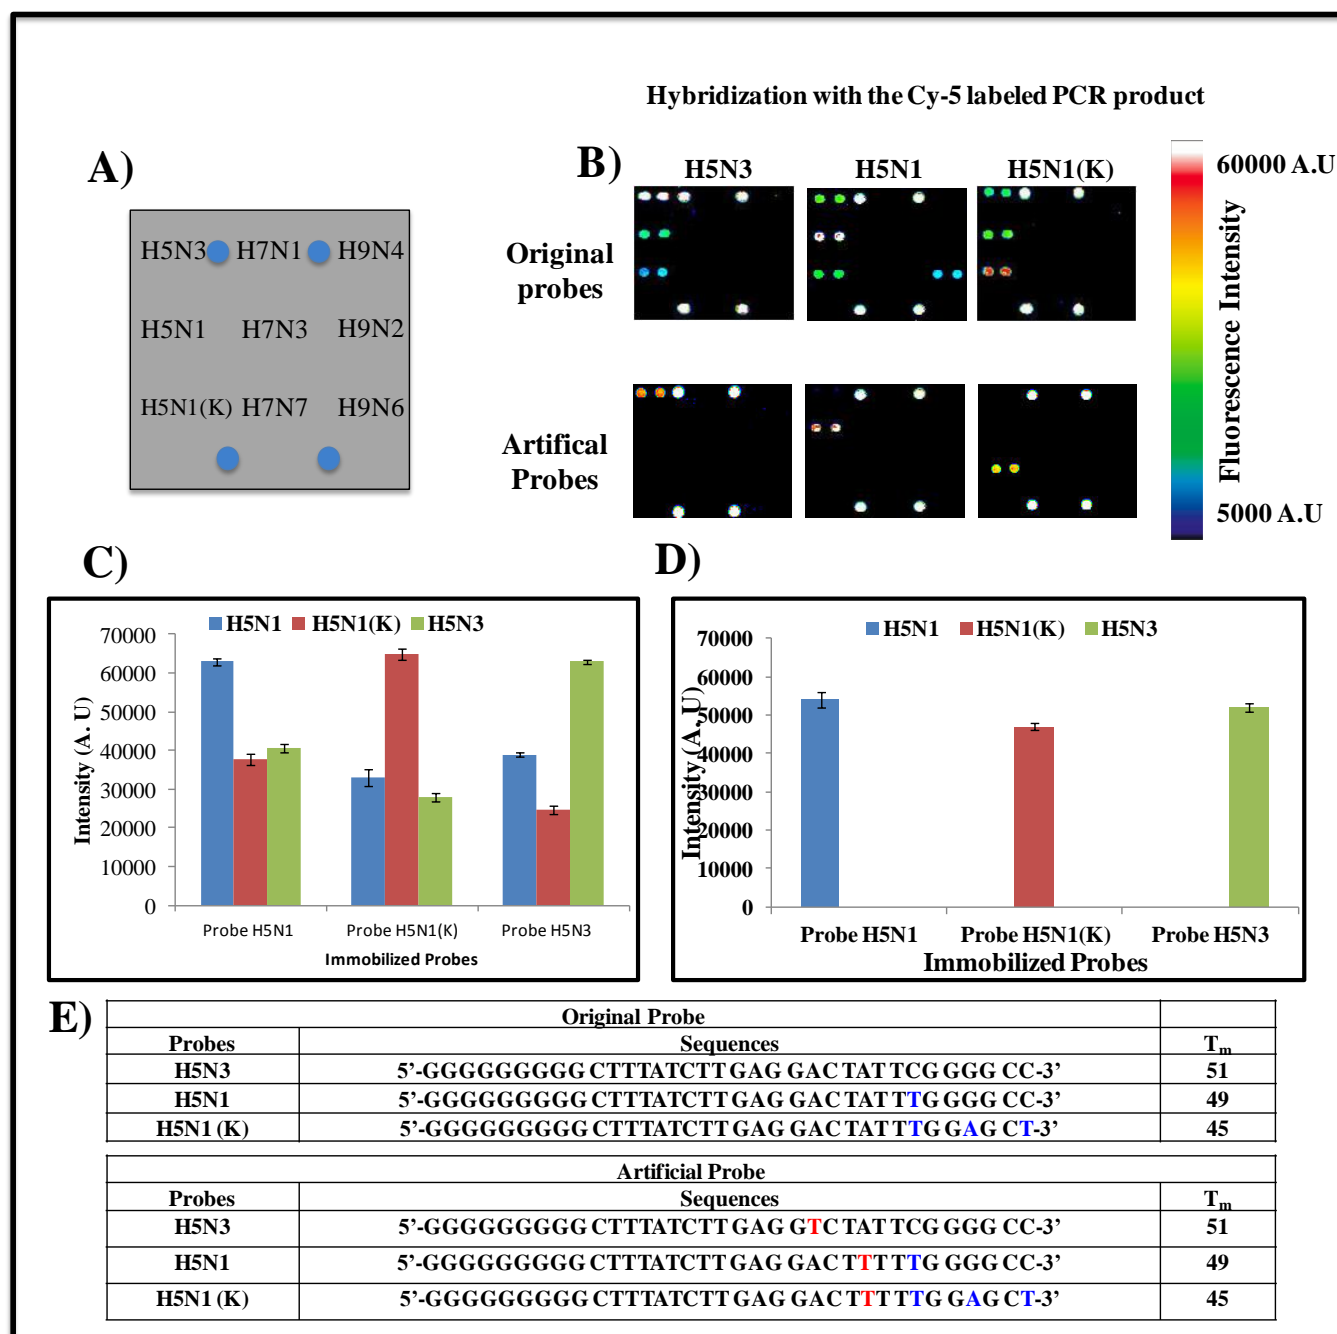

**Figure S17:** Fluorescence image after hybridization of HPAI 9G DNACHip with Cy5 labeled PCR product of H5N3, H5N1, and H5N1 (K). PMT gain = 58.

### 8b. Hybridization with Cy5 labeled PCR products of H7N7, H9N4, and H9N6.

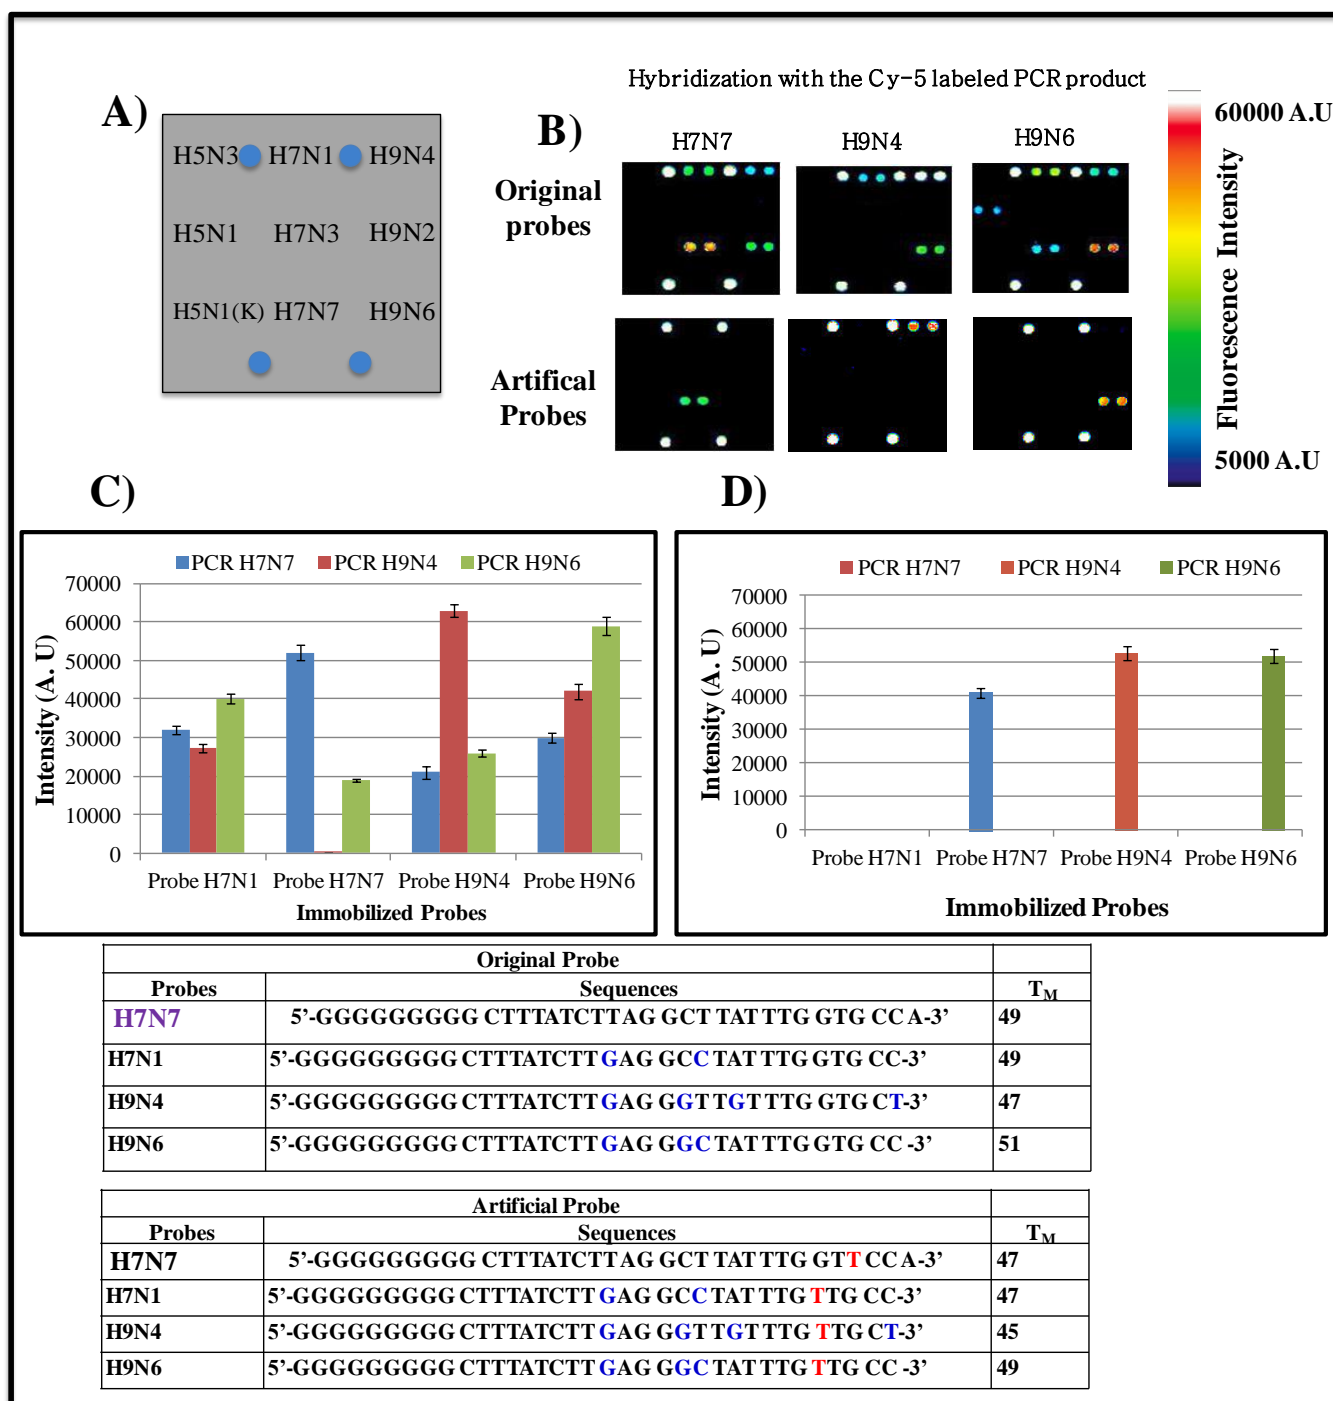

**Figure S18:** Fluorescence image after hybridization of HPAI 9G DNACHip with Cy5 labeled PCR product of H7N7, H9N4, and H9N6. PMT gain = 58.



### 8c. Hybridization with Cy5 labeled PCR products of H9N2, H9N4, and H9N6

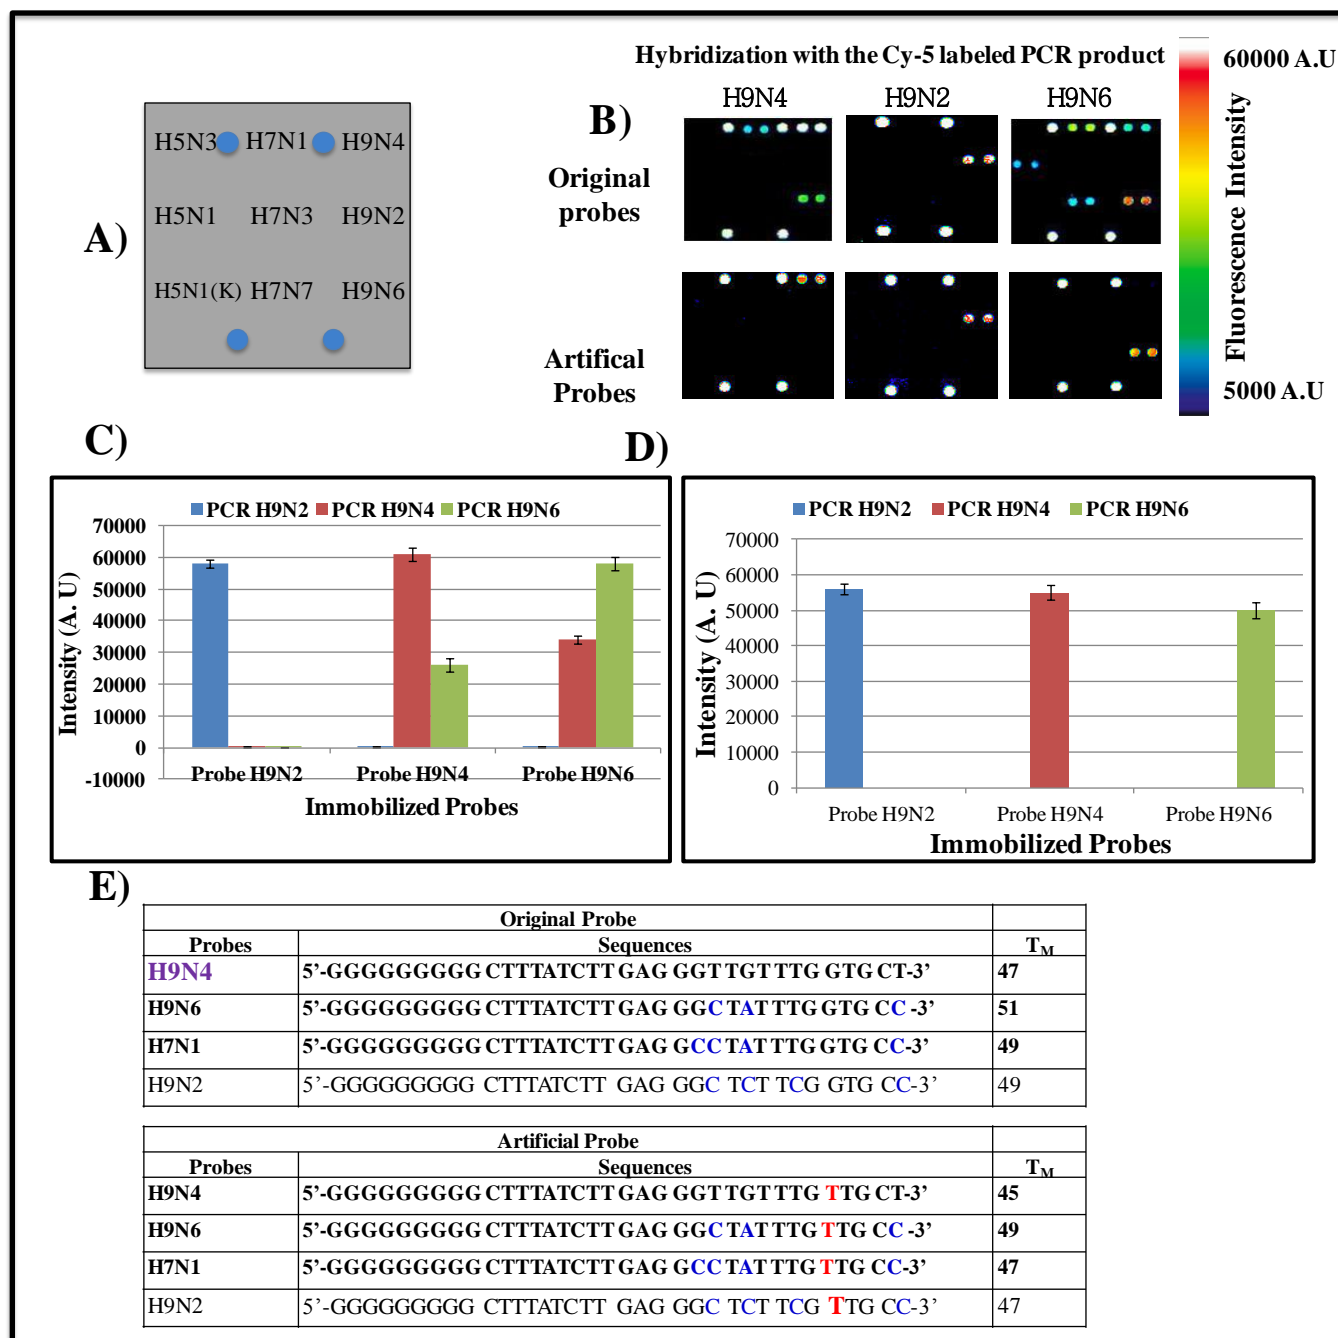

**Figure S19:** Fluorescence image after hybridization of HPAI 9G DNAChip with Cy5 labeled PCR product of H9N2, H9N4, and H9N6. PMT gain = 58.

## 9. Comparison of the probes with and without artificial mutations:

The probes immobilized on the Pre-HPAI 9G DNAChip (original probes without mutations) and the HPAI 9G DNAChip (probes with one artificial mutation) were hybridized with the Cy5 labeled PCR products of the H5N3, H5N1, H5N1(K), H7N7, H9N4, H9N2, and H9N6, respectively. After washing and drying the respective chips were scanned and the results are presented in the Figure S20.

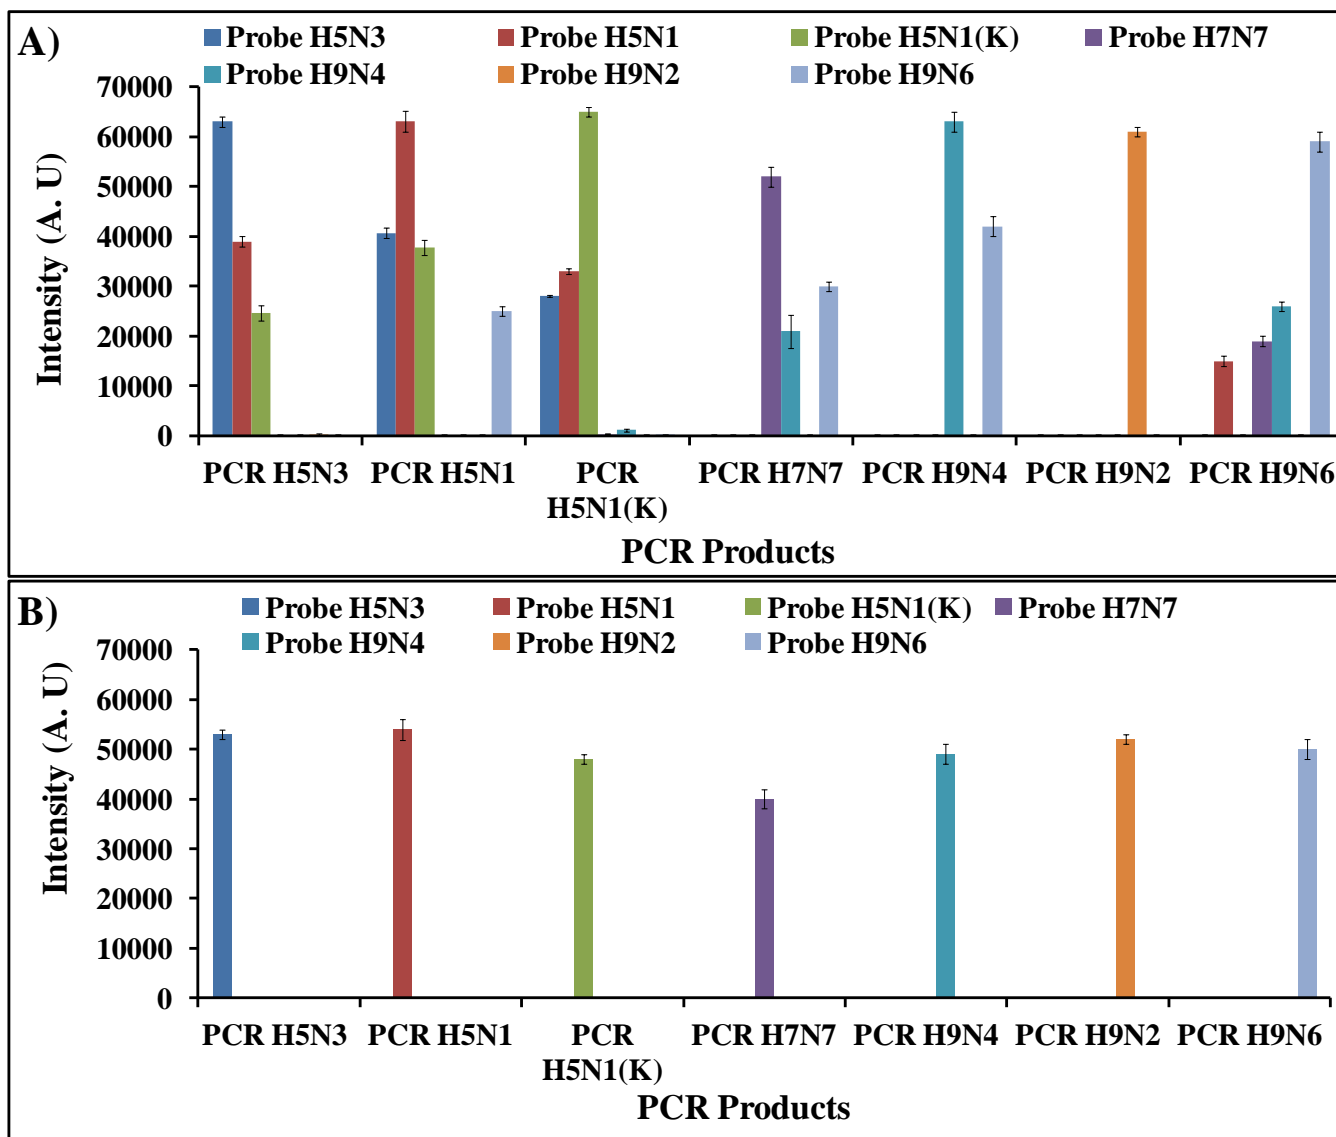

**Figure S20:** Fluorescence intensities after the hybridization with the Cy5 labeled PCR products of H5N3, H5N1, H5N1(K), H7N7, H9N4, H9N2, and H9N6, A) Graph of fluorescence intensities after the hybridization of the probes (original probes) on the pre-HPAI 9G DNAChip, B) Graph of fluorescence intensities after the hybridization of the probes (with one artificial mutation) on the HPAI 9G DNAChip. PMT gain = 58.

## 10. Sensitivity of the HPAI 9G DNAChip

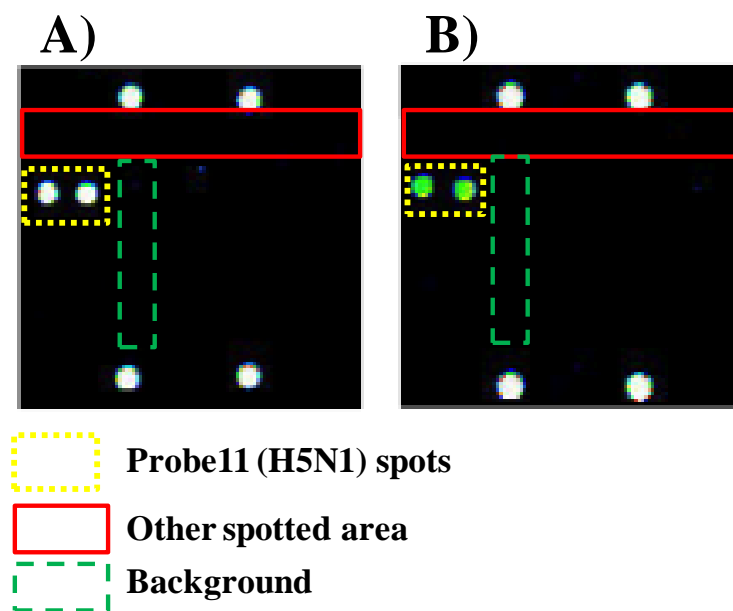

**Figure S21:** Sensitivity of the HPAI 9G DNAChip, A) fluorescence image after the hybridization of the probes on the HPAI 9G DNAChip with the Cy5 labeled PCR product of H5N1 obtained by using  $10^8$  copies of PCR template, B) fluorescence image after the hybridization of the probes on the HPAI 9G DNAChip with the Cy5 labeled PCR product of H5N1 obtained by using  $10^5$  copies of PCR template. MPT gain = 58.

## 11. Detection limit of HPAI 9G DNACHip

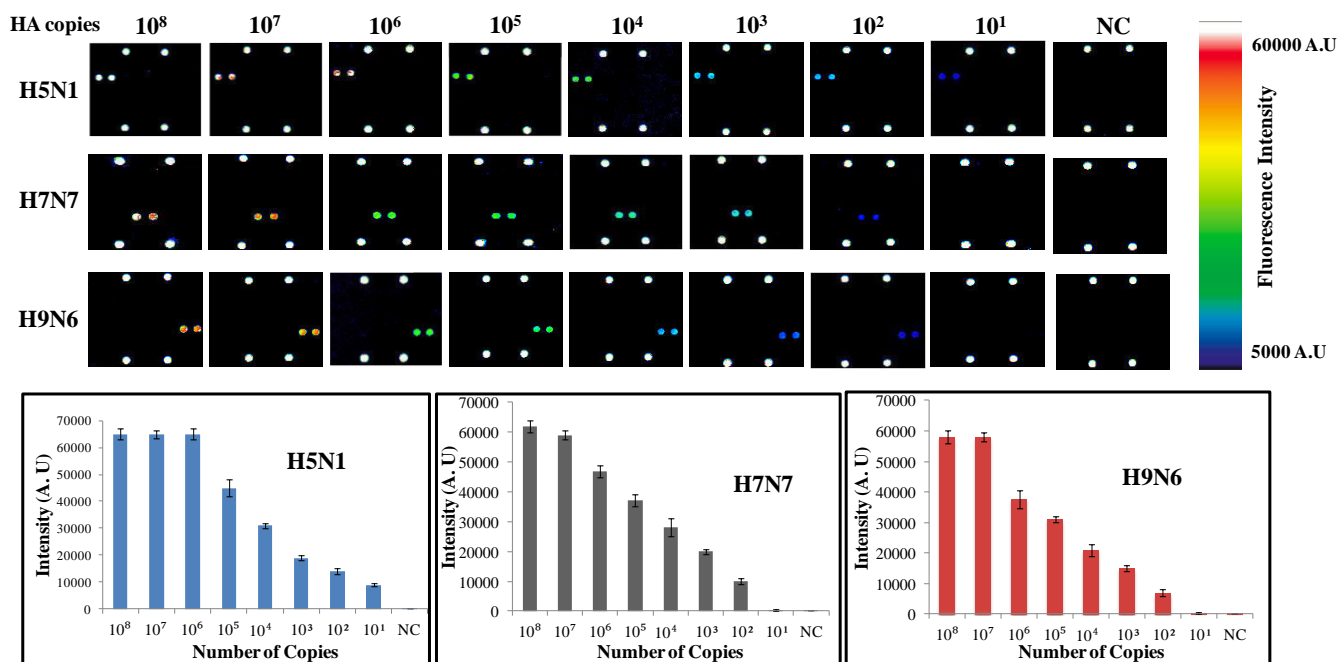

**Figure S22:** Fluorescence images and the corresponding graphs after the hybridization of the probes (with one artificial mutation) on the HPAI 9G DNACHip with the Cy5 labeled PCR product of H5N1, H7N7, and H9N6 obtained by using different concentrations of the PCR templates. PMT gain = 58.

1. Zhang, W. D., and D. H. Evans. 1991. Detection and identification of human influenza viruses by the polymerase chain reaction. *J. Virol. Methods.* **33**: 165–189.
2. (a) K. Song, S. B. Nimse, J. Kim, J. Kim, V. Nguyen, V. Ta, T. Kim, *Chem. Commun.*, 2011, **47**, 7101; (b) K. Song, S. B. Nimse, J. Kim, J. Kim, V. Nguyen, V. Ta, T. Kim, *Chem. Commun.*, 2011, **47**, 7616; (c) S. B. Nimse, K. Song, J. Kim, V. Ta, V. Nguyen, T. Kim, *Chem. Commun.*, 2011, **47**, 12444.
